# Supplementary material for: Significant structural relaxations of excited [n]cycloparaphenylene dications (n = 5–9)
Source: Royal Society of Chemistry journal article supplement (doi:10.1039/c8cp04860f), 2018-01-01

# Electronic Supplementary Information for

## Significant Structural Relaxations of Excited

### [*n*]Cycloparaphenylene Dications ( $n = 5 - 9$ )

*Mamoru Fujitsuka,\*<sup>a</sup> Eiichi Kayahara,<sup>b</sup> Chao Lu,<sup>a</sup> Shigeru Yamago,<sup>b</sup> and Tetsuro Majima\*<sup>a</sup>*

<sup>a</sup> The Institute of Scientific and Industrial Research (SANKEN), Osaka University, Mihogaoka  
8-1, Ibaraki, Osaka 567-0047, Japan

<sup>b</sup> Institute for Chemical Research, Kyoto University, Uji 611-0011, Japan

**Fluorescence decay of [6]CPP<sup>2+</sup>.**

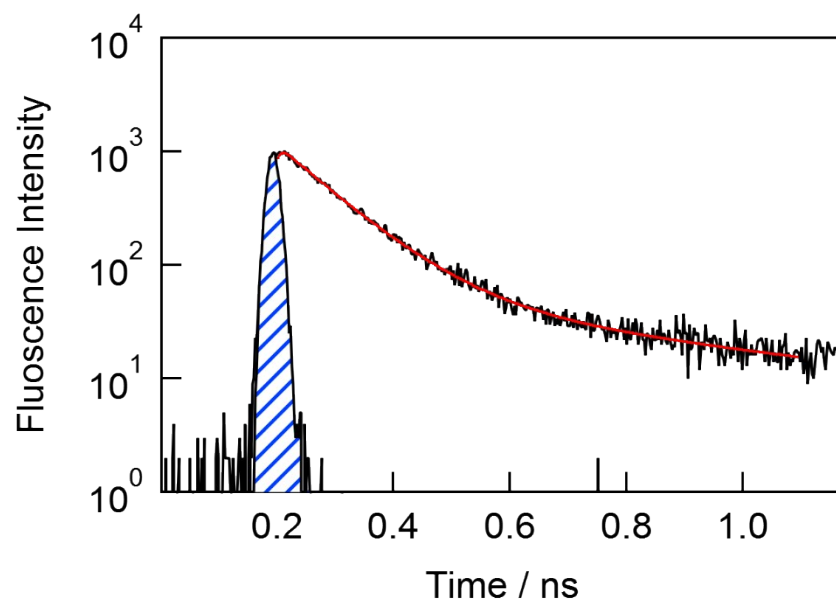

**Figure S1.** Fluorescence decay profile of [6]CPP<sup>2+</sup> around 800 nm in CH<sub>2</sub>Cl<sub>2</sub> upon excitation at 460 nm. Red line is a fitted curve assuming two exponential function with 91 ps (96%) and 640 ps (4%) of lifetimes. Hatched part indicates IRF.

Structures of [n]CPP<sup>2+</sup> in the S<sub>1</sub> state estimated at UB3LYP/6-31G(d) level

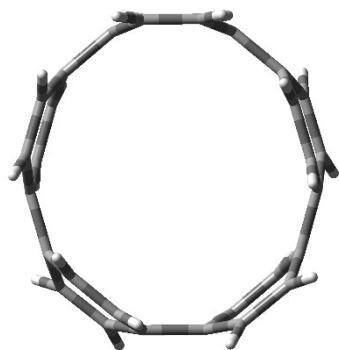

[5]CPP

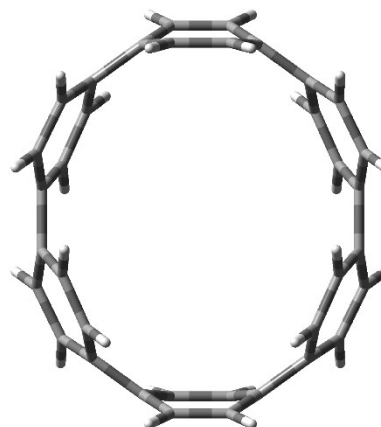

[6]CPP

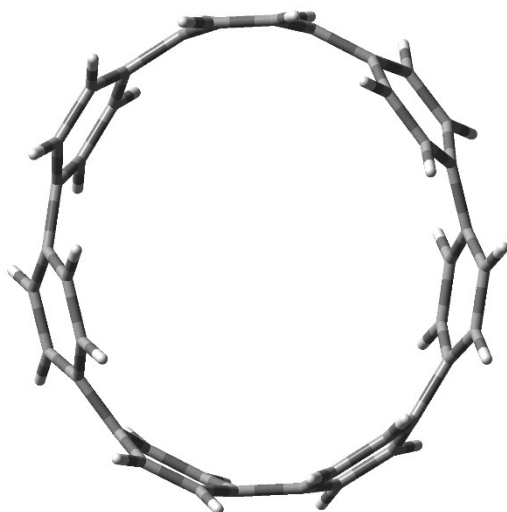

[7]CPP

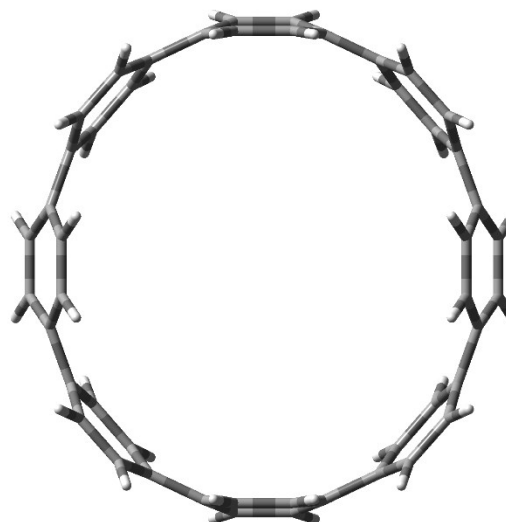

[8]CPP

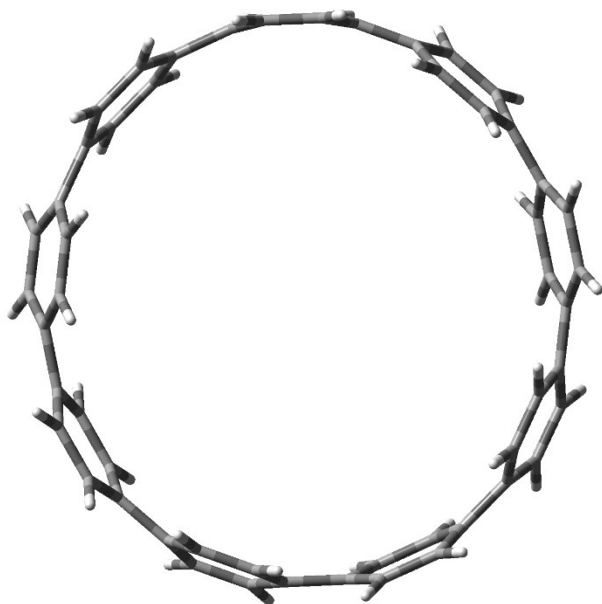

[9]CPP

**Figure S2.** Structures of  $[n]\text{CPP}^{2+}$  in the  $S_1$  state estimated at UB3LYP/6-31G(d) level

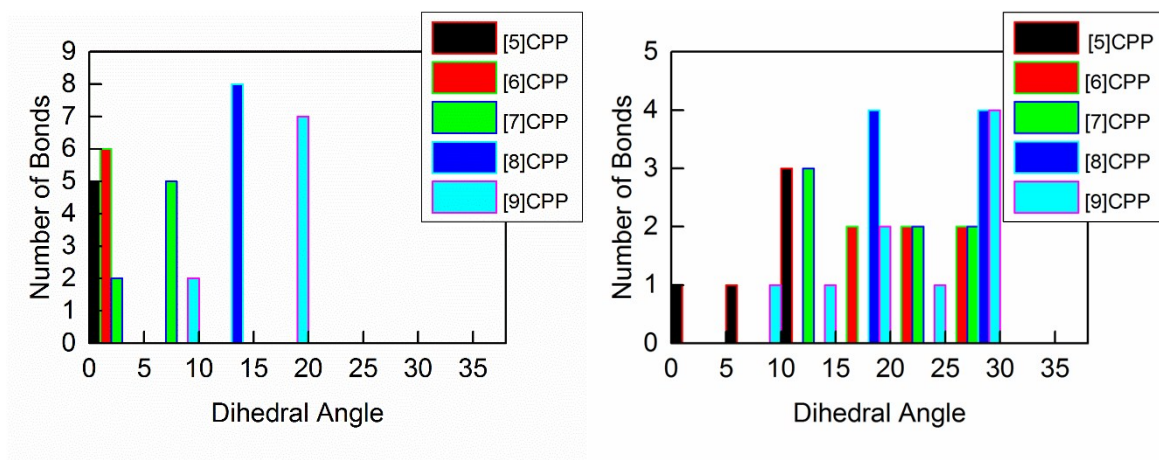

**Figure S3.** Distribution of dihedral angles of  $[n]\text{CPP}^{2+}$  in (left)  $S_0$  and (right)  $S_1$  states estimated at UB3LYP/6-31G(d) level.

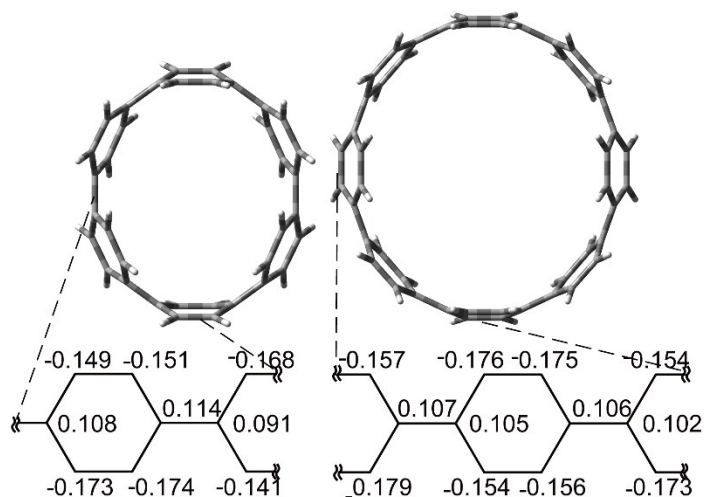

**Figure S4.** Charge distribution of [6]CPP<sup>2+</sup> (left) and (right) [8]CPP<sup>2+</sup>.

### Optimized structures of [n]CPP<sup>2+</sup>.

Table S1. XYZ coordinate of [5]CPP<sup>2+</sup>(D<sub>0</sub>) by B3LYP/6-31G(d).

|   | X          | Y           | Z           |
|---|------------|-------------|-------------|
| C | 1.98682600 | 2.86315900  | -1.21315400 |
| C | 2.93789500 | 1.87459400  | -1.21320500 |
| C | 3.25507900 | 1.17800700  | 0.00017500  |
| C | 2.93787100 | 1.87444700  | 1.21362700  |
| C | 1.98680100 | 2.86302000  | 1.21368100  |
| C | 1.30309400 | 3.20700300  | 0.00028300  |
| C | 3.45296200 | -0.24832900 | 0.00008200  |
| C | 3.33736900 | -1.00481600 | -1.21338000 |
| C | 3.33736800 | -1.00498500 | 1.21344800  |
| C | 2.69085300 | -2.21470800 | -1.21345700 |
| C | 2.69085300 | -2.21487300 | 1.21336000  |
| C | 2.12633800 | -2.73162600 | -0.00008800 |

|   |             |             |             |
|---|-------------|-------------|-------------|
| C | 0.83086200  | -3.36033200 | -0.00016400 |
| C | 0.07564000  | -3.48386700 | -1.21365000 |
| C | 0.07551600  | -3.48388000 | 1.21323900  |
| C | -1.27485900 | -3.24306100 | -1.21373300 |
| C | -1.27498200 | -3.24307800 | 1.21317900  |
| C | -1.94092200 | -2.86611600 | -0.00030500 |
| C | -2.93947100 | -1.82856500 | -0.00030500 |
| C | -3.29086000 | -1.14871100 | 1.21312200  |
| C | -3.29055300 | -1.14846900 | -1.21368000 |
| C | -3.47918600 | 0.21010800  | 1.21324200  |
| C | -3.47888800 | 0.21034900  | -1.21356300 |
| C | -3.32602100 | 0.96010600  | -0.00006700 |
| C | -0.11454500 | 3.45969700  | 0.00028600  |
| C | -0.87495800 | 3.37309900  | 1.21371400  |
| C | -0.87495700 | 3.37344700  | -1.21316300 |
| C | -2.10897100 | 2.77391400  | 1.21363800  |
| C | -2.10897400 | 2.77427000  | -1.21326400 |
| C | -2.64727300 | 2.23010700  | 0.00010300  |
| H | 0.57931200  | -3.63801300 | 2.16096700  |
| H | -1.80096000 | -3.21349600 | -2.16143500 |
| H | -1.80116200 | -3.21345700 | 2.16083400  |
| H | -3.28195100 | -1.67573900 | 2.16070300  |
| H | -3.28137300 | -1.67529300 | -2.16137100 |
| H | 1.66989000  | 3.28419900  | -2.16078500 |
| H | 3.34643100  | 1.54171300  | -2.16085900 |
| H | 3.34636800  | 1.54145400  | 2.16125700  |
| H | 1.66983800  | 3.28392300  | 2.16136600  |

|   |             |             |             |
|---|-------------|-------------|-------------|
| H | 3.63987100  | -0.57325600 | -2.16100700 |
| H | 3.63990700  | -0.57355800 | 2.16112400  |
| H | 2.50035500  | -2.70593400 | -2.16115700 |
| H | 2.50039500  | -2.70625900 | 2.16098300  |
| H | 0.57954300  | -3.63803500 | -2.16131900 |
| H | -3.61389600 | 0.71950500  | 2.16092500  |
| H | -3.61332400 | 0.71994400  | -2.16117700 |
| H | -0.43205300 | 3.65849900  | 2.16141500  |
| H | -0.43207600 | 3.65913600  | -2.16078800 |
| H | -2.60728600 | 2.60228700  | 2.16127400  |
| H | -2.60728600 | 2.60293600  | -2.16095600 |

Sum of electronic and zero-point Energies = -1154.151475 Hartree

Table S2. XYZ coordinate of [6]CPP<sup>2+</sup>(D<sub>0</sub>) by B3LYP/6-31G(d).

|   | X           | Y           | Z           |
|---|-------------|-------------|-------------|
| C | -2.67077000 | 3.17993700  | -0.00001600 |
| C | -3.21948600 | 2.65187400  | -1.21040200 |
| C | -3.90622400 | 1.46205600  | -1.21040300 |
| C | -4.08906400 | 0.72284900  | -0.00002100 |
| C | -3.90649200 | 1.46220900  | 1.21030300  |
| C | -3.21976300 | 2.65203300  | 1.21031000  |
| C | -4.08906400 | -0.72284900 | 0.00002700  |
| C | -1.41855900 | 3.90252000  | 0.00002700  |
| C | -3.90622100 | -1.46205800 | 1.21040700  |
| C | -3.21948300 | -2.65187600 | 1.21040300  |
| C | -2.67077000 | -3.17993800 | 0.00001400  |
| C | -3.21976600 | -2.65203100 | -1.21031000 |

|   |             |             |             |
|---|-------------|-------------|-------------|
| C | -3.90649500 | -1.46220700 | -1.21029800 |
| C | -0.68688200 | 4.11339100  | 1.21042500  |
| C | 0.68688700  | 4.11339200  | 1.21042200  |
| C | 1.41855900  | 3.90252000  | 0.00002100  |
| C | 0.68688300  | 4.11372500  | -1.21031500 |
| C | -0.68688900 | 4.11372600  | -1.21031200 |
| C | -1.41855900 | -3.90252000 | -0.00003100 |
| C | -0.68688200 | -4.11338900 | -1.21043000 |
| C | 0.68688700  | -4.11338900 | -1.21042700 |
| C | 1.41855900  | -3.90252000 | -0.00002500 |
| C | 0.68688300  | -4.11372800 | 1.21031000  |
| C | -0.68688900 | -4.11372800 | 1.21030700  |
| C | 2.67077000  | -3.17993700 | 0.00002200  |
| C | 3.21948200  | -2.65187300 | 1.21041000  |
| C | 3.90622000  | -1.46205500 | 1.21041100  |
| C | 4.08906400  | -0.72284900 | 0.00002900  |
| C | 3.90649600  | -1.46221100 | -1.21029400 |
| C | 3.21976700  | -2.65203500 | -1.21030300 |
| C | 4.08906400  | 0.72284900  | -0.00002300 |
| C | 3.90622300  | 1.46205200  | -1.21040700 |
| C | 3.21948500  | 2.65187000  | -1.21040900 |
| C | 2.67077000  | 3.17993700  | -0.00002400 |
| C | 3.21976400  | 2.65203700  | 1.21030300  |
| C | 3.90649200  | 1.46221300  | 1.21029800  |
| H | -3.00563000 | 3.12488100  | -2.16190800 |
| H | -4.20888300 | 1.04030400  | -2.16190500 |
| H | -4.20941500 | 1.04060100  | 2.16178600  |



|   |             |             |             |
|---|-------------|-------------|-------------|
| H | -3.00620100 | 3.12520900  | 2.16179900  |
| H | -4.20887800 | -1.04030800 | 2.16191100  |
| H | -3.00562500 | -3.12488500 | 2.16190700  |
| H | -3.00620600 | -3.12520400 | -2.16180000 |
| H | -4.20942000 | -1.04059700 | -2.16178000 |
| H | -1.20343700 | 4.16455400  | 2.16193800  |
| H | 1.20344600  | 4.16455400  | 2.16193300  |
| H | 1.20344300  | 4.16523300  | -2.16180900 |
| H | -1.20345300 | 4.16523400  | -2.16180400 |
| H | -1.20343600 | -4.16455000 | -2.16194300 |
| H | 1.20344600  | -4.16455100 | -2.16193800 |
| H | 1.20344300  | -4.16523700 | 2.16180400  |
| H | -1.20345300 | -4.16523700 | 2.16179900  |
| H | 3.00562400  | -3.12487900 | 2.16191600  |
| H | 4.20887700  | -1.04030200 | 2.16191400  |
| H | 4.20942100  | -1.04060300 | -2.16177700 |
| H | 3.00620700  | -3.12521100 | -2.16179200 |
| H | 4.20888200  | 1.04029800  | -2.16190800 |
| H | 3.00562800  | 3.12487400  | -2.16191700 |
| H | 3.00620200  | 3.12521500  | 2.16179100  |
| H | 4.20941600  | 1.04060700  | 2.16178300  |

Sum of electronic and zero-point Energies= -1385.165117 Hartree

Table S3. XYZ coordinate of [7]CPP<sup>2+</sup>(D<sub>0</sub>) by B3LYP/6-31G(d).

|   | X           | Y          | Z           |
|---|-------------|------------|-------------|
| C | -1.41573700 | 4.61514200 | -0.02321000 |

|   |             |             |             |
|---|-------------|-------------|-------------|
| C | -0.68049600 | 4.89260000  | 1.16847700  |
| C | 0.69480100  | 4.88813900  | 1.17105000  |
| C | 1.43229500  | 4.60663200  | -0.01798700 |
| C | 0.69916300  | 4.68309200  | -1.23725100 |
| C | -0.67732800 | 4.68665300  | -1.23977400 |
| C | 2.73788300  | 3.97376900  | 0.01883600  |
| C | 3.24977700  | 3.44157400  | 1.23708000  |
| C | 4.10549400  | 2.36306200  | 1.23746500  |
| C | 4.50758700  | 1.74296300  | 0.01963200  |
| C | 4.27189400  | 2.49510400  | -1.17026100 |
| C | 3.41705600  | 3.57251500  | -1.17067200 |
| C | 4.82615700  | 0.32729800  | -0.01630800 |
| C | 4.93295400  | -0.45391500 | 1.17339600  |
| C | 4.62218400  | -1.79367600 | 1.17245100  |
| C | 4.18275400  | -2.44660300 | -0.01827100 |
| C | 4.41986000  | -1.74577200 | -1.23568300 |
| C | 4.73110700  | -0.40468100 | -1.23472600 |
| C | 3.27400200  | -3.57766100 | 0.01636300  |
| C | 2.64372700  | -3.96314400 | 1.23466000  |
| C | 1.40145100  | -4.55593900 | 1.23555500  |
| C | 0.70398700  | -4.80527400 | 0.01819700  |
| C | 1.48792800  | -4.73903700 | -1.17294800 |
| C | 2.72873900  | -4.14591100 | -1.17389400 |
| C | -0.74649400 | -4.80165400 | -0.01791500 |
| C | -1.52966600 | -4.69918200 | 1.17060200  |
| C | -2.76748900 | -4.10000000 | 1.15572400  |

|   |             |             |             |
|---|-------------|-------------|-------------|
| C | -3.31011500 | -3.55848900 | -0.04838400 |
| C | -2.68188400 | -3.98165200 | -1.25631600 |
| C | -1.44431200 | -4.58285100 | -1.24160200 |
| C | -4.21231900 | -2.42255700 | -0.03209300 |
| C | -4.54939300 | -1.76471700 | 1.18822500  |
| C | -4.85066900 | -0.42284500 | 1.21262700  |
| C | -4.83830800 | 0.35720800  | 0.01825700  |
| C | -4.85359100 | -0.37991200 | -1.20310400 |
| C | -4.55063100 | -1.72142000 | -1.22749500 |
| C | -4.50985500 | 1.77013400  | 0.03746200  |
| C | -4.12225600 | 2.41805600  | 1.24686500  |
| C | -3.26100800 | 3.49113200  | 1.23439500  |
| C | -2.72507200 | 3.99085900  | 0.01167700  |
| C | -3.38995900 | 3.56644000  | -1.17753100 |
| C | -4.25230100 | 2.49515200  | -1.16490800 |
| H | -1.19864100 | 5.03731400  | 2.10975800  |
| H | 1.21114200  | 5.03070800  | 2.11373400  |
| H | 1.21199100  | 4.61211200  | -2.18912100 |
| H | -1.18654400 | 4.62035500  | -2.19385400 |
| H | 2.87381600  | 3.79601700  | 2.18949800  |
| H | 4.36480000  | 1.91665600  | 2.19012900  |
| H | 4.70968100  | 2.18104600  | -2.11119100 |
| H | 3.21117300  | 4.06969900  | -2.11197700 |
| H | 5.19203400  | 0.01687100  | 2.11513000  |
| H | 4.64710200  | -2.33154800 | 2.11356000  |
| H | 4.23424800  | -2.22666600 | -2.18876400 |

|   |             |             |             |
|---|-------------|-------------|-------------|
| H | 4.77635000  | 0.11021100  | -2.18706200 |
| H | 3.07655800  | -3.68163400 | 2.18729300  |
| H | 0.91287200  | -4.71660100 | 2.18920300  |
| H | 1.08213200  | -5.08964600 | -2.11517100 |
| H | 3.25662800  | -4.05170200 | -2.11624100 |
| H | -1.12442900 | -5.02277500 | 2.12258700  |
| H | -3.28735600 | -3.97002000 | 2.09789300  |
| H | -3.11970500 | -3.73724600 | -2.21679600 |
| H | -0.95968500 | -4.77909500 | -2.19069900 |
| H | -4.47344600 | -2.29000800 | 2.13303800  |
| H | -5.00808600 | 0.05035700  | 2.17481400  |
| H | -5.00308600 | 0.12871700  | -2.14824100 |
| H | -4.48311100 | -2.21462000 | -2.19012100 |
| H | -4.41152800 | 2.00636500  | 2.20643600  |
| H | -2.90539700 | 3.87261400  | 2.18421700  |
| H | -3.16343200 | 4.03558000  | -2.12824200 |
| H | -4.66823000 | 2.15828200  | -2.10746300 |

Sum of electronic and zero-point Energies = -1616.169565 Hartree

Table S4. XYZ coordinate of [8]CPP<sup>2+</sup>(D<sub>0</sub>) by B3LYP/6-31G(d).

|   | X          | Y           | Z           |
|---|------------|-------------|-------------|
| C | 5.34311700 | 1.42584100  | -0.02451100 |
| C | 5.65469300 | 0.68856200  | 1.15395500  |
| C | 5.65469300 | -0.68856300 | 1.15395600  |
| C | 5.34311700 | -1.42584200 | -0.02451000 |

|   |             |             |             |
|---|-------------|-------------|-------------|
| C | 5.33035200  | -0.68937400 | -1.23987200 |
| C | 5.33035200  | 0.68937200  | -1.23987300 |
| C | 4.78646200  | -2.77005200 | 0.02450800  |
| C | 4.25683900  | -3.28191800 | 1.23988600  |
| C | 3.28191800  | -4.25683800 | 1.23988600  |
| C | 2.77005300  | -4.78646200 | 0.02450800  |
| C | 3.51170400  | -4.48547300 | -1.15396600 |
| C | 4.48547300  | -3.51170300 | -1.15396600 |
| C | 1.42584200  | -5.34311700 | -0.02451000 |
| C | 0.68856300  | -5.65469200 | 1.15395600  |
| C | -0.68856200 | -5.65469200 | 1.15395600  |
| C | -1.42584100 | -5.34311700 | -0.02451100 |
| C | -0.68937100 | -5.33035300 | -1.23987300 |
| C | 0.68937500  | -5.33035300 | -1.23987200 |
| C | -2.77005200 | -4.78646200 | 0.02450500  |
| C | -3.28192000 | -4.25684100 | 1.23988400  |
| C | -4.25684100 | -3.28192000 | 1.23988400  |
| C | -4.78646200 | -2.77005200 | 0.02450500  |
| C | -4.48547100 | -3.51170100 | -1.15396900 |
| C | -3.51170100 | -4.48547100 | -1.15396900 |
| C | -5.34311700 | -1.42584100 | -0.02451100 |
| C | -5.65469200 | -0.68856200 | 1.15395600  |
| C | -5.65469200 | 0.68856300  | 1.15395600  |
| C | -5.34311700 | 1.42584200  | -0.02451000 |
| C | -5.33035300 | 0.68937500  | -1.23987200 |
| C | -5.33035300 | -0.68937100 | -1.23987300 |

|   |             |             |             |
|---|-------------|-------------|-------------|
| C | -4.78646200 | 2.77005300  | 0.02450800  |
| C | -4.25683900 | 3.28191800  | 1.23988600  |
| C | -3.28191800 | 4.25683900  | 1.23988600  |
| C | -2.77005200 | 4.78646200  | 0.02450800  |
| C | -3.51170300 | 4.48547300  | -1.15396600 |
| C | -4.48547300 | 3.51170400  | -1.15396600 |
| C | -1.42584200 | 5.34311700  | -0.02451000 |
| C | -0.68856300 | 5.65469300  | 1.15395600  |
| C | 0.68856200  | 5.65469200  | 1.15395600  |
| C | 1.42584100  | 5.34311700  | -0.02451100 |
| C | 0.68937200  | 5.33035200  | -1.23987300 |
| C | -0.68937400 | 5.33035200  | -1.23987200 |
| C | 2.77005200  | 4.78646100  | 0.02450600  |
| C | 3.28191900  | 4.25684000  | 1.23988400  |
| C | 4.25684000  | 3.28191900  | 1.23988400  |
| C | 4.78646100  | 2.77005200  | 0.02450600  |
| C | 4.48547100  | 3.51170100  | -1.15396900 |
| C | 3.51170100  | 4.48547100  | -1.15396900 |
| H | 5.84549100  | 1.20812000  | 2.08668300  |
| H | 5.84549100  | -1.20812000 | 2.08668400  |
| H | 5.18824200  | -1.20031200 | -2.18492000 |
| H | 5.18824200  | 1.20030800  | -2.18492100 |
| H | 4.51774500  | -2.82019700 | 2.18493100  |
| H | 2.82019800  | -4.51774500 | 2.18493100  |
| H | 3.27920500  | -4.98776200 | -2.08668800 |
| H | 4.98776200  | -3.27920500 | -2.08668800 |

|   |             |             |             |
|---|-------------|-------------|-------------|
| H | 1.20812000  | -5.84549000 | 2.08668400  |
| H | -1.20812000 | -5.84549000 | 2.08668300  |
| H | -1.20030800 | -5.18824400 | -2.18492100 |
| H | 1.20031200  | -5.18824300 | -2.18491900 |
| H | -2.82020100 | -4.51774900 | 2.18492900  |
| H | -4.51774900 | -2.82020100 | 2.18492900  |
| H | -4.98775800 | -3.27920100 | -2.08669300 |
| H | -3.27920100 | -4.98775800 | -2.08669300 |
| H | -5.84549000 | -1.20812000 | 2.08668300  |
| H | -5.84549000 | 1.20812000  | 2.08668400  |
| H | -5.18824400 | 1.20031200  | -2.18492000 |
| H | -5.18824400 | -1.20030800 | -2.18492100 |
| H | -4.51774500 | 2.82019800  | 2.18493100  |
| H | -2.82019700 | 4.51774500  | 2.18493100  |
| H | -3.27920500 | 4.98776200  | -2.08668900 |
| H | -4.98776200 | 3.27920500  | -2.08668800 |
| H | -1.20812000 | 5.84549000  | 2.08668400  |
| H | 1.20812000  | 5.84549000  | 2.08668300  |
| H | 1.20030800  | 5.18824200  | -2.18492100 |
| H | -1.20031200 | 5.18824200  | -2.18492000 |
| H | 2.82020000  | 4.51774800  | 2.18492900  |
| H | 4.51774800  | 2.82020000  | 2.18492900  |
| H | 4.98775900  | 3.27920100  | -2.08669200 |
| H | 3.27920100  | 4.98775900  | -2.08669200 |

Sum of electronic and zero-point Energies = -1847.168436 Hartree

Table S5. XYZ coordinate of [9]CPP<sup>2+</sup>(D<sub>0</sub>) by B3LYP/6-31G(d).

|   | X           | Y           | Z           |
|---|-------------|-------------|-------------|
| C | -0.51093000 | 6.18950800  | 0.04862400  |
| C | 0.25419600  | 6.41862000  | -1.12786800 |
| C | 1.61737500  | 6.21264100  | -1.14527800 |
| C | 2.31011300  | 5.76536400  | 0.01326900  |
| C | 1.58453700  | 5.78966100  | 1.23210800  |
| C | 0.21956400  | 5.99460700  | 1.24904200  |
| C | 3.59013500  | 5.07037700  | -0.06337900 |
| C | 4.00707600  | 4.47929000  | -1.28420300 |
| C | 4.91979300  | 3.44552700  | -1.30472400 |
| C | 5.48625800  | 2.93345600  | -0.10725400 |
| C | 5.26372300  | 3.70217400  | 1.06963900  |
| C | 4.34530500  | 4.73036100  | 1.09203000  |
| C | 6.02838500  | 1.57985100  | -0.05947000 |
| C | 6.18941900  | 0.79273500  | -1.23210300 |
| C | 6.22380300  | -0.58416500 | -1.17366400 |
| C | 6.10030900  | -1.27682700 | 0.06172300  |
| C | 6.21739600  | -0.48262600 | 1.23480000  |
| C | 6.18242000  | 0.89426800  | 1.17637000  |
| C | 5.08797800  | -3.19798800 | 1.30524800  |
| C | 4.22804600  | -4.27602500 | 1.28370500  |
| C | 3.83991800  | -4.88511600 | 0.06220300  |
| C | 4.57626900  | -4.50594200 | -1.09315200 |
| C | 5.44217700  | -3.43318800 | -1.06974100 |
| C | 2.59607300  | -5.64288000 | -0.01481100 |



|   |             |             |             |
|---|-------------|-------------|-------------|
| C | 1.87238800  | -5.70241100 | -1.23357600 |
| C | 0.51935300  | -5.97518300 | -1.25052300 |
| C | -0.20035700 | -6.20711500 | -0.05016500 |
| C | 0.57542200  | -6.39862900 | 1.12607500  |
| C | 1.92665500  | -6.12503500 | 1.14347200  |
| C | -1.64331800 | -5.99182500 | -0.00652900 |
| C | -2.26773600 | -5.59575900 | 1.20399300  |
| C | -3.48092000 | -4.93726100 | 1.20265000  |
| C | -4.15132700 | -4.63088800 | -0.00926400 |
| C | -3.64911200 | -5.25364900 | -1.18472500 |
| C | -2.43670400 | -5.91077300 | -1.18359700 |
| C | 5.62692800  | -2.65605200 | 0.10817600  |
| C | -5.11812700 | -3.53803000 | -0.05673000 |
| C | -5.31699100 | -2.81432100 | -1.26033700 |
| C | -5.82298600 | -1.52998200 | -1.24916800 |
| C | -6.16298200 | -0.88330000 | -0.03344900 |
| C | -6.20243200 | -1.70086700 | 1.12897000  |
| C | -5.69794500 | -2.98430400 | 1.11755500  |
| C | -6.19960100 | 0.57442600  | 0.03496100  |
| C | -5.89186400 | 1.23748900  | 1.25045900  |
| C | -5.45093200 | 2.54560500  | 1.26126200  |
| C | -5.28916500 | 3.27820000  | 0.05747300  |
| C | -5.84104200 | 2.69594700  | -1.11646900 |
| C | -6.28059400 | 1.38885600  | -1.12750700 |
| C | -4.37829800 | 4.41806100  | 0.00933100  |
| C | -3.90756700 | 5.06572600  | 1.18436200  |

|   |             |             |             |
|---|-------------|-------------|-------------|
| C | -2.72949800 | 5.78260900  | 1.18259500  |
| C | -1.94137100 | 5.90251900  | 0.00532100  |
| C | -2.54549400 | 5.47514200  | -1.20485100 |
| C | -3.72431200 | 4.75695300  | -1.20289100 |
| H | -0.23867700 | 6.72141700  | -2.04555900 |
| H | 2.15490000  | 6.35979300  | -2.07604100 |
| H | 2.07397300  | 5.51831900  | 2.16046600  |
| H | -0.30476600 | 5.87571400  | 2.19021500  |
| H | 3.51775600  | 4.74923800  | -2.21296000 |
| H | 5.11071500  | 2.95680300  | -2.25242500 |
| H | 5.78073400  | 3.45396700  | 1.98975300  |
| H | 4.17452000  | 5.25550800  | 2.02581300  |
| H | 6.22057400  | 1.26445200  | -2.20743300 |
| H | 6.25274400  | -1.13312900 | -2.10757100 |
| H | 6.26837300  | -0.95204900 | 2.21037500  |
| H | 6.17966000  | 1.44394200  | 2.11031200  |
| H | 5.25558000  | -2.70243900 | 2.25380200  |
| H | 3.75396700  | -4.57182200 | 2.21249200  |
| H | 4.43113200  | -5.03731200 | -2.02774300 |
| H | 5.94493900  | -3.15785600 | -1.99001300 |
| H | 2.34752800  | -5.40639800 | -2.16181400 |
| H | -0.01037100 | -5.88198200 | -2.19156800 |
| H | 0.09837300  | -6.72622400 | 2.04361300  |
| H | 2.47094500  | -6.24591000 | 2.07408200  |
| H | -1.73796300 | -5.69108300 | 2.14479000  |
| H | -3.85114500 | -4.54415900 | 2.14243600  |

|   |             |             |             |
|---|-------------|-------------|-------------|
| H | -4.20118200 | -5.18125600 | -2.11572300 |
| H | -2.07315700 | -6.33460200 | -2.11369200 |
| H | -4.95332900 | -3.21317300 | -2.20028500 |
| H | -5.83443700 | -0.97546700 | -2.18047800 |
| H | -6.59688000 | -1.30402600 | 2.05841900  |
| H | -5.71147400 | -3.55724400 | 2.03862200  |
| H | -5.87503000 | 0.68320800  | 2.18183100  |
| H | -5.10726400 | 2.96231100  | 2.20098800  |
| H | -5.88368300 | 3.26735600  | -2.03759700 |
| H | -6.65501700 | 0.97259400  | -2.05674800 |
| H | -4.45510800 | 4.96629400  | 2.11554200  |
| H | -2.38736700 | 6.22452500  | 2.11239500  |
| H | -2.02136800 | 5.59631600  | -2.14583700 |
| H | -4.07464700 | 4.34539000  | -2.14239800 |

Sum of electronic and zero-point Energies = -2078.163583 Hartree

Table S6. XYZ coordinate of [5]CPP<sup>2+</sup>(D<sub>0</sub>) by UB3LYP/6-31G(d).

|   | X          | Y           | Z           |
|---|------------|-------------|-------------|
| C | 1.90925600 | 2.91543900  | -1.21315300 |
| C | 2.88652300 | 1.95276600  | -1.21320400 |
| C | 3.22229200 | 1.26494600  | 0.00017500  |
| C | 2.88650000 | 1.95261500  | 1.21362900  |
| C | 1.90923200 | 2.91529700  | 1.21368200  |
| C | 1.21653900 | 3.24080900  | 0.00028400  |
| C | 3.45838800 | -0.15556800 | 0.00008100  |

|   |             |             |             |
|---|-------------|-------------|-------------|
| C | 3.36313500  | -0.91488200 | -1.21338100 |
| C | 3.36314000  | -0.91505200 | 1.21344700  |
| C | 2.74933000  | -2.14169200 | -1.21345800 |
| C | 2.74933700  | -2.14185900 | 1.21335900  |
| C | 2.19890000  | -2.67358300 | -0.00008900 |
| C | 0.92076300  | -3.33682900 | -0.00016400 |
| C | 0.16912800  | -3.48058700 | -1.21365000 |
| C | 0.16900500  | -3.48060200 | 1.21323800  |
| C | -1.18734500 | -3.27610400 | -1.21373200 |
| C | -1.18746700 | -3.27612400 | 1.21318000  |
| C | -1.86328600 | -2.91716800 | -0.00030500 |
| C | -2.88932300 | -1.90679300 | -0.00030400 |
| C | -3.25883500 | -1.23661800 | 1.21312200  |
| C | -3.25853700 | -1.23637000 | -1.21368000 |
| C | -3.48357200 | 0.11665700  | 1.21324300  |
| C | -3.48328300 | 0.11690500  | -1.21356300 |
| C | -3.35059700 | 0.87049800  | -0.00006700 |
| C | -0.20736800 | 3.45536900  | 0.00028500  |
| C | -0.96518700 | 3.34840800  | 1.21371200  |
| C | -0.96519300 | 3.34875300  | -1.21316200 |
| C | -2.18267900 | 2.71632800  | 1.21363600  |
| C | -2.18268900 | 2.71668100  | -1.21326400 |
| C | -2.70619000 | 2.15826200  | 0.00010200  |
| H | 0.67675500  | -3.62116300 | 2.16096600  |
| H | -1.71405000 | -3.26066600 | -2.16143300 |
| H | -1.71425200 | -3.26063200 | 2.16083400  |

|   |             |             |             |
|---|-------------|-------------|-------------|
| H | -3.23578200 | -1.76321600 | 2.16070400  |
| H | -3.23521900 | -1.76275700 | -2.16137000 |
| H | 1.58113400  | 3.32782200  | -2.16078500 |
| H | 3.30384500  | 1.63096600  | -2.16085700 |
| H | 3.30378300  | 1.63069900  | 2.16125800  |
| H | 1.58108400  | 3.32753800  | 2.16136800  |
| H | 3.65394000  | -0.47535600 | -2.16100900 |
| H | 3.65398900  | -0.47566100 | 2.16112400  |
| H | 2.57207900  | -2.63785200 | -2.16115800 |
| H | 2.57213300  | -2.63817900 | 2.16098300  |
| H | 0.67698500  | -3.62117900 | -2.16131800 |
| H | -3.63190400 | 0.62225500  | 2.16092700  |
| H | -3.63134700 | 0.62270700  | -2.16117800 |
| H | -0.53010100 | 3.64559400  | 2.16141300  |
| H | -0.53013600 | 3.64622400  | -2.16078700 |
| H | -2.67621200 | 2.53140200  | 2.16127200  |
| H | -2.67622500 | 2.53204500  | -2.16095700 |

Sum of electronic and zero-point Energies = -1154.151483 Hartree

Table S7. XYZ coordinate of [6]CPP<sup>2+</sup>(D<sub>0</sub>) by UB3LYP/6-31G(d).

|   | X           | Y          | Z           |
|---|-------------|------------|-------------|
| C | -2.67077000 | 3.17993700 | -0.00001600 |
| C | -3.21948600 | 2.65187400 | -1.21040200 |
| C | -3.90622400 | 1.46205600 | -1.21040300 |
| C | -4.08906400 | 0.72284900 | -0.00002100 |

|   |             |             |             |
|---|-------------|-------------|-------------|
| C | -3.90649200 | 1.46220900  | 1.21030300  |
| C | -3.21976300 | 2.65203300  | 1.21031000  |
| C | -4.08906400 | -0.72284900 | 0.00002700  |
| C | -1.41855900 | 3.90252000  | 0.00002700  |
| C | -3.90622100 | -1.46205800 | 1.21040700  |
| C | -3.21948300 | -2.65187600 | 1.21040300  |
| C | -2.67077000 | -3.17993800 | 0.00001400  |
| C | -3.21976600 | -2.65203100 | -1.21031000 |
| C | -3.90649500 | -1.46220700 | -1.21029800 |
| C | -0.68688200 | 4.11339100  | 1.21042500  |
| C | 0.68688700  | 4.11339200  | 1.21042200  |
| C | 1.41855900  | 3.90252000  | 0.00002100  |
| C | 0.68688300  | 4.11372500  | -1.21031500 |
| C | -0.68688900 | 4.11372600  | -1.21031200 |
| C | -1.41855900 | -3.90252000 | -0.00003100 |
| C | -0.68688200 | -4.11338900 | -1.21043000 |
| C | 0.68688800  | -4.11338900 | -1.21042700 |
| C | 1.41855900  | -3.90252000 | -0.00002500 |
| C | 0.68688300  | -4.11372800 | 1.21031000  |
| C | -0.68688900 | -4.11372800 | 1.21030700  |
| C | 2.67077000  | -3.17993700 | 0.00002200  |
| C | 3.21948200  | -2.65187300 | 1.21041000  |
| C | 3.90622000  | -1.46205500 | 1.21041100  |
| C | 4.08906400  | -0.72284900 | 0.00002900  |
| C | 3.90649600  | -1.46221100 | -1.21029400 |
| C | 3.21976700  | -2.65203500 | -1.21030300 |

|   |             |             |             |
|---|-------------|-------------|-------------|
| C | 4.08906400  | 0.72284900  | -0.00002300 |
| C | 3.90622300  | 1.46205200  | -1.21040700 |
| C | 3.21948500  | 2.65187000  | -1.21040900 |
| C | 2.67077000  | 3.17993700  | -0.00002400 |
| C | 3.21976400  | 2.65203700  | 1.21030300  |
| C | 3.90649200  | 1.46221300  | 1.21029800  |
| H | -3.00563000 | 3.12488100  | -2.16190800 |
| H | -4.20888300 | 1.04030400  | -2.16190500 |
| H | -4.20941500 | 1.04060100  | 2.16178600  |
| H | -3.00620100 | 3.12520900  | 2.16180000  |
| H | -4.20887800 | -1.04030800 | 2.16191100  |
| H | -3.00562500 | -3.12488500 | 2.16190700  |
| H | -3.00620600 | -3.12520400 | -2.16180100 |
| H | -4.20942000 | -1.04059700 | -2.16178000 |
| H | -1.20343700 | 4.16455400  | 2.16193800  |
| H | 1.20344600  | 4.16455400  | 2.16193300  |
| H | 1.20344300  | 4.16523300  | -2.16180900 |
| H | -1.20345300 | 4.16523400  | -2.16180400 |
| H | -1.20343600 | -4.16455000 | -2.16194300 |
| H | 1.20344600  | -4.16455100 | -2.16193800 |
| H | 1.20344300  | -4.16523700 | 2.16180400  |
| H | -1.20345300 | -4.16523700 | 2.16179900  |
| H | 3.00562400  | -3.12487900 | 2.16191600  |
| H | 4.20887700  | -1.04030200 | 2.16191400  |
| H | 4.20942100  | -1.04060300 | -2.16177700 |
| H | 3.00620700  | -3.12521100 | -2.16179200 |

|   |            |            |             |
|---|------------|------------|-------------|
| H | 4.20888200 | 1.04029800 | -2.16190800 |
| H | 3.00562800 | 3.12487400 | -2.16191700 |
| H | 3.00620200 | 3.12521500 | 2.16179100  |
| H | 4.20941600 | 1.04060700 | 2.16178300  |

Sum of electronic and zero-point Energies = -1385.165117 Hartree

Table S8. XYZ coordinate of [7]CPP<sup>2+</sup>(D<sub>0</sub>) by UB3LYP/6-31G(d).

|   | X           | Y           | Z           |
|---|-------------|-------------|-------------|
| C | -1.41651600 | 4.61490800  | -0.02307300 |
| C | -0.68128600 | 4.89244700  | 1.16860200  |
| C | 0.69401200  | 4.88821600  | 1.17113400  |
| C | 1.43151800  | 4.60687400  | -0.01793500 |
| C | 0.69833700  | 4.68325800  | -1.23717400 |
| C | -0.67815500 | 4.68658800  | -1.23965600 |
| C | 2.73721300  | 3.97422900  | 0.01882800  |
| C | 3.24924000  | 3.44209000  | 1.23704200  |
| C | 4.10513700  | 2.36372100  | 1.23737000  |
| C | 4.50729000  | 1.74371800  | 0.01950800  |
| C | 4.27142900  | 2.49584800  | -1.17035900 |
| C | 3.41641100  | 3.57311600  | -1.17071300 |
| C | 4.82609700  | 0.32810700  | -0.01647600 |
| C | 4.93307300  | -0.45311400 | 1.17320600  |
| C | 4.62253000  | -1.79292700 | 1.17224400  |
| C | 4.18316100  | -2.44590200 | -0.01847500 |
| C | 4.42009900  | -1.74500400 | -1.23588000 |



|   |             |             |             |
|---|-------------|-------------|-------------|
| C | 4.73112000  | -0.40386000 | -1.23490600 |
| C | 3.27460100  | -3.57711400 | 0.01616900  |
| C | 2.64442800  | -3.96271800 | 1.23448000  |
| C | 1.40225100  | -4.55572200 | 1.23540400  |
| C | 0.70479300  | -4.80515800 | 0.01806300  |
| C | 1.48868600  | -4.73877200 | -1.17310500 |
| C | 2.72939800  | -4.14543700 | -1.17407900 |
| C | -0.74569000 | -4.80177900 | -0.01800100 |
| C | -1.52884300 | -4.69949600 | 1.17054500  |
| C | -2.76676700 | -4.10052100 | 1.15573300  |
| C | -3.30951900 | -3.55904200 | -0.04833300 |
| C | -2.68125400 | -3.98204000 | -1.25630400 |
| C | -1.44358000 | -4.58303300 | -1.24165700 |
| C | -4.21191300 | -2.42326200 | -0.03196800 |
| C | -4.54899700 | -1.76548900 | 1.18838200  |
| C | -4.85049900 | -0.42366700 | 1.21281900  |
| C | -4.83836800 | 0.35639600  | 0.01845500  |
| C | -4.85362600 | -0.38071700 | -1.20291100 |
| C | -4.55044200 | -1.72217300 | -1.22733700 |
| C | -4.51015400 | 1.76937700  | 0.03765400  |
| C | -4.12265700 | 2.41737800  | 1.24704900  |
| C | -3.26159000 | 3.49059800  | 1.23456300  |
| C | -2.72574500 | 3.99040400  | 0.01183600  |
| C | -3.39057000 | 3.56586200  | -1.17736200 |
| C | -4.25273100 | 2.49442900  | -1.16472400 |
| H | -1.19942500 | 5.03703500  | 2.10990500  |

|   |             |             |             |
|---|-------------|-------------|-------------|
| H | 1.21035700  | 5.03083400  | 2.11380900  |
| H | 1.21114800  | 4.61240400  | -2.18906300 |
| H | -1.18738700 | 4.62024800  | -2.19372400 |
| H | 2.87325500  | 3.79644800  | 2.18948200  |
| H | 4.36455200  | 1.91733600  | 2.19001400  |
| H | 4.70923500  | 2.18188500  | -2.11131100 |
| H | 3.21041200  | 4.07028800  | -2.11199900 |
| H | 5.19211400  | 0.01769400  | 2.11494000  |
| H | 4.64757700  | -2.33081700 | 2.11334000  |
| H | 4.23452700  | -2.22590600 | -2.18896500 |
| H | 4.77623400  | 0.11106100  | -2.18723200 |
| H | 3.07723800  | -3.68114500 | 2.18710300  |
| H | 0.91372500  | -4.71647300 | 2.18906400  |
| H | 1.08292100  | -5.08943800 | -2.11531900 |
| H | 3.25724400  | -4.05112800 | -2.11644000 |
| H | -1.12352600 | -5.02307300 | 2.12250000  |
| H | -3.28663400 | -3.97068100 | 2.09792200  |
| H | -3.11913900 | -3.73765000 | -2.21675900 |
| H | -0.95894500 | -4.77914100 | -2.19077700 |
| H | -4.47287100 | -2.29077000 | 2.13318600  |
| H | -5.00790200 | 0.04950100  | 2.17502400  |
| H | -5.00329900 | 0.12789200  | -2.14803000 |
| H | -4.48292800 | -2.21535900 | -2.18997100 |
| H | -4.41186700 | 2.00565600  | 2.20662500  |
| H | -2.90604700 | 3.87215700  | 2.18437900  |
| H | -3.16412300 | 4.03502400  | -2.12808100 |

|   |             |            |             |
|---|-------------|------------|-------------|
| H | -4.66860000 | 2.15747500 | -2.10727500 |
|---|-------------|------------|-------------|

Sum of electronic and zero-point Energies = -1616.169565 Hartree

Table S9. XYZ coordinate of [8]CPP<sup>2+</sup>(D<sub>0</sub>) by UB3LYP/6-31G(d).

|   | X           | Y           | Z           |
|---|-------------|-------------|-------------|
| C | 5.34311700  | 1.42584100  | -0.02451100 |
| C | 5.65469200  | 0.68856200  | 1.15395600  |
| C | 5.65469300  | -0.68856200 | 1.15395600  |
| C | 5.34311700  | -1.42584200 | -0.02451000 |
| C | 5.33035200  | -0.68937400 | -1.23987200 |
| C | 5.33035200  | 0.68937200  | -1.23987300 |
| C | 4.78646200  | -2.77005200 | 0.02450800  |
| C | 4.25683900  | -3.28191800 | 1.23988600  |
| C | 3.28191900  | -4.25683900 | 1.23988600  |
| C | 2.77005300  | -4.78646200 | 0.02450800  |
| C | 3.51170300  | -4.48547300 | -1.15396600 |
| C | 4.48547300  | -3.51170300 | -1.15396600 |
| C | 1.42584200  | -5.34311700 | -0.02451000 |
| C | 0.68856300  | -5.65469200 | 1.15395700  |
| C | -0.68856200 | -5.65469200 | 1.15395600  |
| C | -1.42584100 | -5.34311700 | -0.02451100 |
| C | -0.68937200 | -5.33035300 | -1.23987300 |
| C | 0.68937500  | -5.33035300 | -1.23987200 |
| C | -2.77005200 | -4.78646200 | 0.02450600  |
| C | -3.28192000 | -4.25684100 | 1.23988400  |

|   |             |             |             |
|---|-------------|-------------|-------------|
| C | -4.25684100 | -3.28192000 | 1.23988400  |
| C | -4.78646200 | -2.77005200 | 0.02450500  |
| C | -4.48547100 | -3.51170100 | -1.15397000 |
| C | -3.51170100 | -4.48547100 | -1.15396900 |
| C | -5.34311700 | -1.42584000 | -0.02451100 |
| C | -5.65469200 | -0.68856200 | 1.15395600  |
| C | -5.65469200 | 0.68856300  | 1.15395600  |
| C | -5.34311700 | 1.42584300  | -0.02451000 |
| C | -5.33035200 | 0.68937500  | -1.23987200 |
| C | -5.33035200 | -0.68937100 | -1.23987300 |
| C | -4.78646200 | 2.77005300  | 0.02450800  |
| C | -4.25683800 | 3.28191800  | 1.23988600  |
| C | -3.28191700 | 4.25683900  | 1.23988600  |
| C | -2.77005200 | 4.78646200  | 0.02450800  |
| C | -3.51170300 | 4.48547300  | -1.15396600 |
| C | -4.48547300 | 3.51170400  | -1.15396600 |
| C | -1.42584200 | 5.34311700  | -0.02451000 |
| C | -0.68856300 | 5.65469300  | 1.15395600  |
| C | 0.68856200  | 5.65469300  | 1.15395500  |
| C | 1.42584100  | 5.34311700  | -0.02451100 |
| C | 0.68937200  | 5.33035100  | -1.23987300 |
| C | -0.68937400 | 5.33035100  | -1.23987300 |
| C | 2.77005100  | 4.78646100  | 0.02450600  |
| C | 3.28191900  | 4.25684000  | 1.23988400  |
| C | 4.25684000  | 3.28191900  | 1.23988400  |
| C | 4.78646100  | 2.77005200  | 0.02450600  |

|   |             |             |             |
|---|-------------|-------------|-------------|
| C | 4.48547100  | 3.51170100  | -1.15396900 |
| C | 3.51170100  | 4.48547100  | -1.15396900 |
| H | 5.84549000  | 1.20812000  | 2.08668300  |
| H | 5.84549000  | -1.20812000 | 2.08668400  |
| H | 5.18824300  | -1.20031100 | -2.18492000 |
| H | 5.18824300  | 1.20030900  | -2.18492100 |
| H | 4.51774600  | -2.82019800 | 2.18493100  |
| H | 2.82019800  | -4.51774500 | 2.18493100  |
| H | 3.27920500  | -4.98776200 | -2.08668900 |
| H | 4.98776200  | -3.27920400 | -2.08668900 |
| H | 1.20812000  | -5.84548900 | 2.08668500  |
| H | -1.20812000 | -5.84549000 | 2.08668400  |
| H | -1.20030800 | -5.18824400 | -2.18492100 |
| H | 1.20031200  | -5.18824400 | -2.18492000 |
| H | -2.82020200 | -4.51774900 | 2.18492900  |
| H | -4.51774900 | -2.82020100 | 2.18492900  |
| H | -4.98775800 | -3.27920000 | -2.08669300 |
| H | -3.27920100 | -4.98775800 | -2.08669300 |
| H | -5.84549000 | -1.20812000 | 2.08668300  |
| H | -5.84549000 | 1.20812000  | 2.08668400  |
| H | -5.18824300 | 1.20031200  | -2.18491900 |
| H | -5.18824300 | -1.20030800 | -2.18492100 |
| H | -4.51774400 | 2.82019700  | 2.18493100  |
| H | -2.82019700 | 4.51774500  | 2.18493100  |
| H | -3.27920500 | 4.98776200  | -2.08668800 |
| H | -4.98776200 | 3.27920500  | -2.08668800 |

|   |             |            |             |
|---|-------------|------------|-------------|
| H | -1.20812000 | 5.84549100 | 2.08668300  |
| H | 1.20812000  | 5.84549100 | 2.08668200  |
| H | 1.20030800  | 5.18824100 | -2.18492100 |
| H | -1.20031200 | 5.18824200 | -2.18492000 |
| H | 2.82019900  | 4.51774800 | 2.18492900  |
| H | 4.51774700  | 2.82020000 | 2.18492900  |
| H | 4.98775900  | 3.27920200 | -2.08669200 |
| H | 3.27920100  | 4.98775900 | -2.08669200 |

Sum of electronic and zero-point Energies = -1847.168436 Hartree

Table S10. XYZ coordinate of [9]CPP<sup>2+</sup>(D<sub>0</sub>) by UB3LYP/6-31G(d).

|   | X           | Y          | Z           |
|---|-------------|------------|-------------|
| C | -0.51035600 | 6.18955400 | 0.04863000  |
| C | 0.25479100  | 6.41860100 | -1.12786100 |
| C | 1.61795200  | 6.21249600 | -1.14527200 |
| C | 2.31064800  | 5.76514900 | 0.01327300  |
| C | 1.58507400  | 5.78950800 | 1.23211200  |
| C | 0.22012000  | 5.99458000 | 1.24904700  |
| C | 3.59060600  | 5.07004400 | -0.06337800 |
| C | 4.00749000  | 4.47892000 | -1.28420300 |
| C | 4.92011200  | 3.44507300 | -1.30472700 |
| C | 5.48653200  | 2.93294900 | -0.10725900 |
| C | 5.26407100  | 3.70168700 | 1.06963600  |
| C | 4.34574700  | 4.72995800 | 1.09202900  |
| C | 6.02853400  | 1.57929400 | -0.05947500 |

|   |             |             |             |
|---|-------------|-------------|-------------|
| C | 6.18948900  | 0.79216200  | -1.23210900 |
| C | 6.22374400  | -0.58474100 | -1.17367000 |
| C | 6.10019100  | -1.27739100 | 0.06171800  |
| C | 6.21735800  | -0.48320000 | 1.23479400  |
| C | 6.18250900  | 0.89369600  | 1.17636400  |
| C | 5.08767800  | -3.19845200 | 1.30524700  |
| C | 4.22764700  | -4.27640900 | 1.28370700  |
| C | 3.83946500  | -4.88547000 | 0.06220600  |
| C | 4.57585400  | -4.50636900 | -1.09314800 |
| C | 5.44186100  | -3.43369500 | -1.06974000 |
| C | 2.59555000  | -5.64311900 | -0.01480800 |
| C | 1.87185900  | -5.70258200 | -1.23357200 |
| C | 0.51879900  | -5.97522800 | -1.25051800 |
| C | -0.20093200 | -6.20709500 | -0.05016100 |
| C | 0.57483000  | -6.39868200 | 1.12607900  |
| C | 1.92608800  | -6.12521300 | 1.14347600  |
| C | -1.64387400 | -5.99167200 | -0.00652500 |
| C | -2.26825400 | -5.59554300 | 1.20399600  |
| C | -3.48137700 | -4.93693400 | 1.20265200  |
| C | -4.15175800 | -4.63050500 | -0.00926300 |
| C | -3.64960100 | -5.25331700 | -1.18472100 |
| C | -2.43725300 | -5.91055300 | -1.18359200 |
| C | 5.62668200  | -2.65657200 | 0.10817400  |
| C | -5.11845700 | -3.53755800 | -0.05673300 |
| C | -5.31724900 | -2.81383100 | -1.26034000 |
| C | -5.82312500 | -1.52944400 | -1.24917300 |

|   |             |             |             |
|---|-------------|-------------|-------------|
| C | -6.16306600 | -0.88273100 | -0.03345500 |
| C | -6.20259700 | -1.70029500 | 1.12896300  |
| C | -5.69822800 | -2.98377800 | 1.11755000  |
| C | -6.19954900 | 0.57499900  | 0.03495500  |
| C | -5.89175200 | 1.23803300  | 1.25045500  |
| C | -5.45069800 | 2.54610700  | 1.26125900  |
| C | -5.28886200 | 3.27868900  | 0.05747100  |
| C | -5.84079200 | 2.69648800  | -1.11647200 |
| C | -6.28046500 | 1.38943800  | -1.12751200 |
| C | -4.37788900 | 4.41846500  | 0.00933100  |
| C | -3.90709800 | 5.06608500  | 1.18436500  |
| C | -2.72896200 | 5.78285800  | 1.18260000  |
| C | -1.94082400 | 5.90269800  | 0.00532600  |
| C | -2.54498600 | 5.47538000  | -1.20484700 |
| C | -3.72387000 | 4.75730000  | -1.20288900 |
| H | -0.23805400 | 6.72144800  | -2.04555000 |
| H | 2.15549000  | 6.35960300  | -2.07603400 |
| H | 2.07448500  | 5.51811600  | 2.16046800  |
| H | -0.30422000 | 5.87573000  | 2.19021900  |
| H | 3.51819300  | 4.74891300  | -2.21295900 |
| H | 5.11098700  | 2.95633200  | -2.25242800 |
| H | 5.78106000  | 3.45343200  | 1.98974900  |
| H | 4.17501300  | 5.25512100  | 2.02581300  |
| H | 6.22068400  | 1.26387600  | -2.20744000 |
| H | 6.25262900  | -1.13370800 | -2.10757600 |
| H | 6.26829600  | -0.95262900 | 2.21036900  |



|   |             |             |             |
|---|-------------|-------------|-------------|
| H | 6.17980500  | 1.44337100  | 2.11030500  |
| H | 5.25532300  | -2.70291300 | 2.25379800  |
| H | 3.75353600  | -4.57215700 | 2.21249300  |
| H | 4.43066900  | -5.03773000 | -2.02773800 |
| H | 5.94465100  | -3.15841400 | -1.99001200 |
| H | 2.34702700  | -5.40661100 | -2.16181000 |
| H | -0.01091700 | -5.88197600 | -2.19156300 |
| H | 0.09775000  | -6.72623400 | 2.04361600  |
| H | 2.47036700  | -6.24614000 | 2.07408500  |
| H | -1.73848800 | -5.69091100 | 2.14479300  |
| H | -3.85156400 | -4.54379200 | 2.14243600  |
| H | -4.20166500 | -5.18087800 | -2.11572000 |
| H | -2.07374600 | -6.33442000 | -2.11368600 |
| H | -4.95361900 | -3.21271500 | -2.20028600 |
| H | -5.83451900 | -0.97492700 | -2.18048300 |
| H | -6.59701300 | -1.30341700 | 2.05841100  |
| H | -5.71181500 | -3.55671800 | 2.03861600  |
| H | -5.87497000 | 0.68374900  | 2.18182600  |
| H | -5.10699100 | 2.96278000  | 2.20098700  |
| H | -5.88338000 | 3.26790200  | -2.03760000 |
| H | -6.65492600 | 0.97321200  | -2.05675300 |
| H | -4.45464900 | 4.96670200  | 2.11554400  |
| H | -2.38679100 | 6.22474100  | 2.11240000  |
| H | -2.02084900 | 5.59650700  | -2.14583300 |
| H | -4.07424400 | 4.34577100  | -2.14239800 |

Sum of electronic and zero-point Energies = -2078.163583 Hartree

Table S11. XYZ coordinate of [5]CPP<sup>2+</sup>(D<sub>1</sub>) by B3LYP/6-31G(d).

|   | X           | Y           | Z           |
|---|-------------|-------------|-------------|
| C | -2.90015300 | 1.96104300  | -1.21578500 |
| C | -1.91040600 | 2.91305500  | -1.21475600 |
| C | -1.21471900 | 3.22896700  | 0.00016200  |
| C | -1.91044400 | 2.91318500  | 1.21509600  |
| C | -2.90019500 | 1.96118100  | 1.21621900  |
| C | -3.24367200 | 1.27483700  | 0.00026400  |
| C | 0.21787800  | 3.43758700  | 0.00018700  |
| C | 0.97288000  | 3.32981400  | -1.21423500 |
| C | 0.97279400  | 3.32957900  | 1.21462800  |
| C | 2.19569900  | 2.70187500  | -1.21505100 |
| C | 2.19561500  | 2.70161200  | 1.21538800  |
| C | 2.72470800  | 2.14901700  | 0.00011300  |
| C | 3.37457500  | 0.86178400  | -0.00002400 |
| C | 3.51301900  | 0.10596800  | -1.21645500 |
| C | 3.51291900  | 0.10566300  | 1.21625300  |
| C | 3.28246200  | -1.24616000 | -1.21636800 |
| C | 3.28239300  | -1.24647500 | 1.21584500  |
| C | 2.90190100  | -1.91310600 | -0.00034500 |
| C | 1.86416500  | -2.91675200 | -0.00045200 |
| C | 1.18457800  | -3.26553000 | 1.21434900  |
| C | 1.18426100  | -3.26485800 | -1.21527700 |
| C | -0.17640100 | -3.46206400 | 1.21406900  |
| C | -0.17673200 | -3.46140500 | -1.21473600 |
| C | -0.92590100 | -3.32015300 | -0.00019600 |

|   |             |             |             |
|---|-------------|-------------|-------------|
| C | -3.48498000 | -0.14499800 | 0.00030900  |
| C | -3.38898400 | -0.90735600 | 1.21661700  |
| C | -3.38951700 | -0.90738000 | -1.21600200 |
| C | -2.76752800 | -2.13109100 | 1.21555300  |
| C | -2.76806400 | -2.13112100 | -1.21517900 |
| C | -2.21137000 | -2.65664900 | 0.00007000  |
| H | 3.67937200  | 0.61080300  | 2.16138300  |
| H | 3.27175100  | -1.77799300 | -2.16143500 |
| H | 3.27157000  | -1.77852700 | 2.16078400  |
| H | 1.71134400  | -3.25431400 | 2.16202300  |
| H | 1.71076200  | -3.25311500 | -2.16308700 |
| H | -3.32825400 | 1.64973600  | -2.16225400 |
| H | -1.58119100 | 3.32790100  | -2.16098600 |
| H | -1.58123400 | 3.32813100  | 2.16128800  |
| H | -3.32831100 | 1.65000300  | 2.16272300  |
| H | 0.53679900  | 3.62689600  | -2.16147000 |
| H | 0.53665100  | 3.62649000  | 2.16188900  |
| H | 2.69138300  | 2.52194500  | -2.16252100 |
| H | 2.69127900  | 2.52155300  | 2.16284100  |
| H | 3.67955400  | 0.61134800  | -2.16144300 |
| H | -0.68496500 | -3.59966500 | 2.16173500  |
| H | -0.68556700 | -3.59842900 | -2.16234000 |
| H | -3.69409700 | -0.47350000 | 2.16253100  |
| H | -3.69505000 | -0.47356700 | -2.16180200 |
| H | -2.59566900 | -2.63337500 | 2.16113100  |
| H | -2.59665300 | -2.63345600 | -2.16081500 |

Sum of electronic and zero-point Energies = -1154.080229 Hartree

Table S12. XYZ coordinate of [6]CPP<sup>2+</sup>(D<sub>1</sub>) by B3LYP/6-31G(d).

|   | X           | Y           | A           |
|---|-------------|-------------|-------------|
| C | -2.66464200 | 3.20001100  | -0.01512300 |
| C | -3.11792600 | 2.61643200  | -1.23855900 |
| C | -3.79218100 | 1.41487400  | -1.23861600 |
| C | -4.05930500 | 0.72828200  | -0.01781000 |
| C | -3.96274500 | 1.51011000  | 1.17428100  |
| C | -3.28436400 | 2.70749800  | 1.17688900  |
| C | -4.05931400 | -0.72830800 | 0.01781300  |
| C | -1.41780700 | 3.93371900  | 0.02038300  |
| C | -3.79221600 | -1.41491300 | 1.23862000  |
| C | -3.11797400 | -2.61647400 | 1.23856500  |
| C | -2.66467300 | -3.20004700 | 0.01512600  |
| C | -3.28439400 | -2.70752800 | -1.17689000 |
| C | -3.96276400 | -1.51013800 | -1.17428000 |
| C | -0.68697800 | 4.06631300  | 1.24469600  |
| C | 0.68700800  | 4.06632700  | 1.24469600  |
| C | 1.41784000  | 3.93374200  | 0.02038000  |
| C | 0.68627900  | 4.23815000  | -1.17506100 |
| C | -0.68625600 | 4.23814000  | -1.17505800 |
| C | -1.41784000 | -3.93374100 | -0.02037900 |
| C | -0.68700800 | -4.06632800 | -1.24469400 |
| C | 0.68697700  | -4.06631400 | -1.24469500 |
| C | 1.41780600  | -3.93371800 | -0.02038200 |

|   |             |             |             |
|---|-------------|-------------|-------------|
| C | 0.68625500  | -4.23813800 | 1.17505900  |
| C | -0.68627900 | -4.23814800 | 1.17506200  |
| C | 2.66464100  | -3.20001200 | 0.01512400  |
| C | 3.11792700  | -2.61643200 | 1.23855900  |
| C | 3.79218300  | -1.41487500 | 1.23861500  |
| C | 4.05930500  | -0.72828200 | 0.01780900  |
| C | 3.96274300  | -1.51011100 | -1.17428200 |
| C | 3.28436300  | -2.70749900 | -1.17688900 |
| C | 4.05931500  | 0.72830800  | -0.01781500 |
| C | 3.79221600  | 1.41491300  | -1.23862100 |
| C | 3.11797400  | 2.61647500  | -1.23856500 |
| C | 2.66467300  | 3.20004800  | -0.01512600 |
| C | 3.28439500  | 2.70752900  | 1.17688900  |
| C | 3.96276600  | 1.51013800  | 1.17427900  |
| H | -2.82333700 | 3.04112900  | -2.19106000 |
| H | -3.99756100 | 0.94081900  | -2.19125900 |
| H | -4.34517200 | 1.12671300  | 2.11381100  |
| H | -3.15247200 | 3.22898500  | 2.11851400  |
| H | -3.99760700 | -0.94086100 | 2.19126300  |
| H | -2.82340700 | -3.04118600 | 2.19106500  |
| H | -3.15250700 | -3.22901800 | -2.11851400 |
| H | -4.34519400 | -1.12673800 | -2.11380800 |
| H | -1.20423500 | 4.03565900  | 2.19674200  |
| H | 1.20426600  | 4.03568700  | 2.19674200  |
| H | 1.20925000  | 4.38667900  | -2.11346000 |
| H | -1.20923200 | 4.38666300  | -2.11345500 |

|   |             |             |             |
|---|-------------|-------------|-------------|
| H | -1.20426600 | -4.03568900 | -2.19674000 |
| H | 1.20423500  | -4.03566200 | -2.19674100 |
| H | 1.20923100  | -4.38665900 | 2.11345700  |
| H | -1.20925000 | -4.38667500 | 2.11346100  |
| H | 2.82334000  | -3.04112900 | 2.19106000  |
| H | 3.99756400  | -0.94081900 | 2.19125800  |
| H | 4.34517000  | -1.12671400 | -2.11381300 |
| H | 3.15246900  | -3.22898500 | -2.11851400 |
| H | 3.99760600  | 0.94086100  | -2.19126400 |
| H | 2.82340500  | 3.04118600  | -2.19106600 |
| H | 3.15250800  | 3.22901800  | 2.11851400  |
| H | 4.34519600  | 1.12673700  | 2.11380700  |

Table S13. XYZ coordinate of [7]CPP<sup>2+</sup>(D<sub>1</sub>) by B3LYP/6-31G(d).

|   | X           | Y          | Z           |
|---|-------------|------------|-------------|
| C | -1.39846700 | 4.56643600 | -0.03796000 |
| C | -0.65420800 | 4.95461000 | 1.11162000  |
| C | 0.72558900  | 4.95902600 | 1.09492900  |
| C | 1.44546400  | 4.57865400 | -0.07381200 |
| C | 0.69806100  | 4.50825800 | -1.28062400 |
| C | -0.68367800 | 4.49977300 | -1.26232100 |
| C | 2.76585800  | 3.96314700 | -0.01388300 |
| C | 3.24757800  | 3.42877200 | 1.21471900  |
| C | 4.11842800  | 2.36153400 | 1.23029800  |
| C | 4.55905600  | 1.75508400 | 0.01587900  |

|   |             |             |             |
|---|-------------|-------------|-------------|
| C | 4.34926500  | 2.51676700  | -1.17575000 |
| C | 3.48378400  | 3.58583000  | -1.18906100 |
| C | 4.87597000  | 0.34104800  | -0.01684300 |
| C | 5.01316900  | -0.43706600 | 1.17452300  |
| C | 4.68781200  | -1.77373800 | 1.18826600  |
| C | 4.19856100  | -2.42154900 | 0.01402800  |
| C | 4.40193400  | -1.73246400 | -1.21467000 |
| C | 4.73343700  | -0.39527600 | -1.23088200 |
| C | 3.26886300  | -3.54400200 | 0.07504800  |
| C | 2.56139600  | -3.79703300 | 1.28107000  |
| C | 1.31010000  | -4.38339900 | 1.26235200  |
| C | 0.69548700  | -4.75467800 | 0.03798200  |
| C | 1.53638900  | -4.78836000 | -1.11001600 |
| C | 2.78449700  | -4.19984800 | -1.09259300 |
| C | -0.76369900 | -4.76072400 | -0.05795000 |
| C | -1.60376500 | -4.76671600 | 1.09289800  |
| C | -2.85105100 | -4.18251200 | 1.06206700  |
| C | -3.34190500 | -3.55584400 | -0.12381000 |
| C | -2.63978100 | -3.86160300 | -1.32703700 |
| C | -1.38979700 | -4.44261100 | -1.29360800 |
| C | -4.25811600 | -2.43246100 | -0.07662400 |
| C | -4.59924500 | -1.81377400 | 1.16586100  |
| C | -4.89886300 | -0.47378600 | 1.23102400  |
| C | -4.88056900 | 0.34338200  | 0.05790400  |
| C | -4.91111800 | -0.35821700 | -1.18663800 |
| C | -4.60994800 | -1.69788100 | -1.25188300 |

|   |             |             |             |
|---|-------------|-------------|-------------|
| C | -4.53224500 | 1.75087800  | 0.11113600  |
| C | -4.02542400 | 2.31906800  | 1.31661100  |
| C | -3.14464600 | 3.37996600  | 1.28813000  |
| C | -2.71909300 | 3.94447200  | 0.05555300  |
| C | -3.48196100 | 3.59662300  | -1.09614800 |
| C | -4.35864100 | 2.53383000  | -1.07031600 |
| H | -1.16667400 | 5.19069700  | 2.03838900  |
| H | 1.25786000  | 5.19746500  | 2.00973200  |
| H | 1.19878700  | 4.31900800  | -2.22290400 |
| H | -1.20776700 | 4.30127500  | -2.19006600 |
| H | 2.82743700  | 3.76404500  | 2.15604200  |
| H | 4.35227700  | 1.90376600  | 2.18437900  |
| H | 4.82491900  | 2.21863200  | -2.10387500 |
| H | 3.30271700  | 4.10148000  | -2.12622500 |
| H | 5.31683200  | 0.03570900  | 2.10232500  |
| H | 4.74581000  | -2.31738400 | 2.12532600  |
| H | 4.16233700  | -2.21481300 | -2.15540100 |
| H | 4.74672400  | 0.11855900  | -2.18497100 |
| H | 2.93027400  | -3.40727900 | 2.22260600  |
| H | 0.75005200  | -4.42643800 | 2.18929500  |
| H | 1.17686000  | -5.22410100 | -2.03634700 |
| H | 3.36947000  | -4.18921200 | -2.00624600 |
| H | -1.23989800 | -5.17417800 | 2.03024900  |
| H | -3.42709400 | -4.14318700 | 1.97992500  |
| H | -3.02188900 | -3.52834200 | -2.28443200 |
| H | -0.83709300 | -4.52803900 | -2.22220300 |



|   |             |             |             |
|---|-------------|-------------|-------------|
| H | -4.52025000 | -2.36963200 | 2.09305300  |
| H | -5.06711000 | -0.02818400 | 2.20488300  |
| H | -5.06401100 | 0.18113700  | -2.11433800 |
| H | -4.55939900 | -2.16920600 | -2.22678400 |
| H | -4.22368100 | 1.84631700  | 2.27101400  |
| H | -2.67854200 | 3.68670900  | 2.21748500  |
| H | -3.32922100 | 4.12634800  | -2.03058200 |
| H | -4.86444000 | 2.25721000  | -1.98878600 |

Sum of electronic and zero-point Energies = -1616.116523 Hartree

Table S14. XYZ coordinate of [8]CPP<sup>2+</sup>(D<sub>1</sub>) by B3LYP/6-31G(d).

|   | X          | Y           | Z           |
|---|------------|-------------|-------------|
| C | 5.34121700 | 1.38568500  | 0.00765900  |
| C | 5.68990600 | 0.63832900  | 1.16791400  |
| C | 5.70887400 | -0.73948800 | 1.14658300  |
| C | 5.38600100 | -1.46259000 | -0.03920500 |
| C | 5.33697500 | -0.70592400 | -1.24373800 |
| C | 5.31201000 | 0.67344700  | -1.21962300 |
| C | 4.83930900 | -2.80883400 | -0.00463000 |
| C | 4.31821300 | -3.34046000 | 1.20963800  |
| C | 3.33712600 | -4.30799200 | 1.20127200  |
| C | 2.81106400 | -4.81184800 | -0.02103000 |
| C | 3.55276000 | -4.50491400 | -1.20027200 |
| C | 4.53137000 | -3.53739100 | -1.19277400 |
| C | 1.45695900 | -5.34735600 | -0.07054600 |

|   |             |             |             |
|---|-------------|-------------|-------------|
| C | 0.73464300  | -5.70827600 | 1.10172200  |
| C | -0.64537700 | -5.68904300 | 1.12282900  |
| C | -1.38953700 | -5.30093200 | -0.02380100 |
| C | -0.67817300 | -5.21387100 | -1.24584500 |
| C | 0.70324800  | -5.24045900 | -1.27026000 |
| C | -2.73821400 | -4.72900200 | 0.06909300  |
| C | -3.14313500 | -4.11040100 | 1.27629900  |
| C | -4.12785200 | -3.13807400 | 1.28490800  |
| C | -4.76053000 | -2.72722400 | 0.08525600  |
| C | -4.53502200 | -3.53113700 | -1.06375700 |
| C | -3.55353700 | -4.50458200 | -1.07096300 |
| C | -5.34121100 | -1.38569600 | 0.00747700  |
| C | -5.68987800 | -0.63821000 | 1.16766000  |
| C | -5.70884300 | 0.73960100  | 1.14618400  |
| C | -5.38599000 | 1.46258500  | -0.03968600 |
| C | -5.33701200 | 0.70578400  | -1.24414100 |
| C | -5.31205300 | -0.67358100 | -1.21988200 |
| C | -4.83930300 | 2.80882400  | -0.00524300 |
| C | -4.31836900 | 3.34067000  | 1.20900400  |
| C | -3.33728500 | 4.30819900  | 1.20060300  |
| C | -2.81105000 | 4.81184600  | -0.02171700 |
| C | -3.55260500 | 4.50471500  | -1.20100000 |
| C | -4.53121100 | 3.53719400  | -1.19346700 |
| C | -1.45694900 | 5.34734900  | -0.07116400 |
| C | -0.73472100 | 5.70832700  | 1.10114500  |
| C | 0.64529500  | 5.68909800  | 1.12236300  |

|   |             |             |             |
|---|-------------|-------------|-------------|
| C | 1.38955000  | 5.30093000  | -0.02418900 |
| C | 0.67828100  | 5.21382500  | -1.24628800 |
| C | -0.70313500 | 5.24040800  | -1.27081500 |
| C | 2.73821800  | 4.72900500  | 0.06884500  |
| C | 3.14303800  | 4.11047500  | 1.27612200  |
| C | 4.12775300  | 3.13814500  | 1.28486900  |
| C | 4.76052900  | 2.72722900  | 0.08529500  |
| C | 4.53511600  | 3.53106400  | -1.06378800 |
| C | 3.55362800  | 4.50450900  | -1.07113400 |
| H | 5.89323700  | 1.15150300  | 2.10213300  |
| H | 5.92627400  | -1.27198200 | 2.06632300  |
| H | 5.18205200  | -1.20421000 | -2.19359600 |
| H | 5.13310100  | 1.20219600  | -2.14909800 |
| H | 4.59063900  | -2.89462300 | 2.15920700  |
| H | 2.87706100  | -4.58158100 | 2.14385800  |
| H | 3.31397400  | -4.99986700 | -2.13563000 |
| H | 5.03512800  | -3.29769900 | -2.12305200 |
| H | 1.26692500  | -5.95737800 | 2.01371000  |
| H | -1.15997600 | -5.92323600 | 2.04920000  |
| H | -1.20644700 | -4.98997300 | -2.16591100 |
| H | 1.20278400  | -5.04122700 | -2.21124000 |
| H | -2.59257500 | -4.29425300 | 2.19207500  |
| H | -4.31055100 | -2.60005600 | 2.20813000  |
| H | -5.10295000 | -3.35360400 | -1.97129800 |
| H | -3.37694300 | -5.06507100 | -1.98343400 |
| H | -5.89319300 | -1.15127800 | 2.10193900  |

|   |             |             |             |
|---|-------------|-------------|-------------|
| H | -5.92622200 | 1.27218200  | 2.06587700  |
| H | -5.18214500 | 1.20396200  | -2.19406400 |
| H | -5.13319900 | -1.20242300 | -2.14931400 |
| H | -4.59093900 | 2.89502200  | 2.15862000  |
| H | -2.87736900 | 4.58196700  | 2.14320900  |
| H | -3.31370700 | 4.99950800  | -2.13641300 |
| H | -5.03484200 | 3.29735300  | -2.12377400 |
| H | -1.26706900 | 5.95747200  | 2.01308200  |
| H | 1.15982000  | 5.92333700  | 2.04876400  |
| H | 1.20663100  | 4.98989900  | -2.16630500 |
| H | -1.20259000 | 5.04115100  | -2.21183300 |
| H | 2.59240100  | 4.29437900  | 2.19184100  |
| H | 4.31037500  | 2.60017100  | 2.20813300  |
| H | 5.10311900  | 3.35346700  | -1.97127000 |
| H | 3.37710600  | 5.06493800  | -1.98365600 |

Sum of electronic and zero-point Energies = -1847.122560 Hartree

Table S15. XYZ coordinate of [9]CPP<sup>2+</sup>(D<sub>1</sub>) by B3LYP/6-31G(d).

|   | X           | Y          | Z           |
|---|-------------|------------|-------------|
| C | -5.34753300 | 3.00597000 | 0.06097800  |
| C | -5.17422400 | 3.82583400 | -1.08119600 |
| C | -4.24201400 | 4.84872100 | -1.09015400 |
| C | -3.43534500 | 5.11289100 | 0.04520000  |
| C | -3.77507600 | 4.44310900 | 1.24411700  |
| C | -4.70428300 | 3.41577600 | 1.25065700  |

|   |             |             |             |
|---|-------------|-------------|-------------|
| C | -2.14670600 | 5.80717500  | -0.04685000 |
| C | -1.43077000 | 5.80086700  | -1.26964800 |
| C | -0.06582200 | 6.00397900  | -1.29972700 |
| C | 0.67547600  | 6.22841900  | -0.10757100 |
| C | -0.08634000 | 6.48594600  | 1.06763100  |
| C | -1.45069900 | 6.28062400  | 1.09681400  |
| C | 2.10183200  | 5.93596200  | -0.06023200 |
| C | 2.84958800  | 5.63476200  | -1.23442000 |
| C | 4.00873200  | 4.89338800  | -1.17545000 |
| C | 4.50882000  | 4.39664800  | 0.06213000  |
| C | 3.91948400  | 4.94578300  | 1.23678700  |
| C | 2.76022300  | 5.68701900  | 1.17779700  |
| C | 5.48312900  | 2.45760700  | 1.30012200  |
| C | 5.87091600  | 1.13335700  | 1.26922800  |
| C | 6.17330900  | 0.48560000  | 0.04564400  |
| C | 6.30857400  | 1.31602400  | -1.09844100 |
| C | 5.92309200  | 2.64068000  | -1.06841000 |
| C | 6.08287500  | -0.97516100 | -0.04626800 |
| C | 5.61713600  | -1.56468100 | -1.24513100 |
| C | 5.07365700  | -2.83879500 | -1.25136900 |
| C | 4.97102800  | -3.59428300 | -0.06151400 |
| C | 5.64308500  | -3.09326500 | 1.08048900  |
| C | 6.18114900  | -1.81823800 | 1.08921000  |
| C | 3.98327800  | -4.68294700 | 0.01632700  |
| C | 3.27869900  | -4.89423200 | 1.22350200  |
| C | 2.06239300  | -5.55427300 | 1.23559800  |

|   |             |             |             |
|---|-------------|-------------|-------------|
| C | 1.47719000  | -6.03488900 | 0.03801800  |
| C | 2.29468700  | -6.02270800 | -1.12241500 |
| C | 3.51303000  | -5.36842900 | -1.13167800 |
| C | 5.37259900  | 3.22457600  | 0.10806500  |
| C | 0.03128700  | -6.25130900 | -0.02007900 |
| C | -0.67157800 | -6.03675300 | -1.23380800 |
| C | -2.02252600 | -5.75483100 | -1.23754400 |
| C | -2.75989800 | -5.66435000 | -0.02587200 |
| C | -2.10807300 | -6.13862800 | 1.14801000  |
| C | -0.75947300 | -6.42447400 | 1.14980200  |
| C | -3.98617900 | -4.88003000 | 0.02589900  |
| C | -4.37786800 | -4.24889300 | 1.23766400  |
| C | -5.20038900 | -3.14080600 | 1.23408700  |
| C | -5.68962100 | -2.59226300 | 0.02032900  |
| C | -5.51499300 | -3.38259400 | -1.14971600 |
| C | -4.68998200 | -4.48697300 | -1.14803000 |
| C | -6.09925900 | -1.18902900 | -0.03767900 |
| C | -6.42993800 | -0.44150600 | 1.12298700  |
| C | -6.34666700 | 0.93882500  | 1.13197800  |
| C | -5.92221200 | 1.65301300  | -0.01647000 |
| C | -5.82008200 | 0.92459600  | -1.22374300 |
| C | -5.90957000 | -0.45629900 | -1.23561100 |
| H | -5.74581300 | 3.62678000  | -1.98228600 |
| H | -4.10599300 | 5.42719400  | -1.99847500 |
| H | -3.21525800 | 4.63907300  | 2.15199700  |
| H | -4.83772400 | 2.84403100  | 2.16257300  |

|   |             |             |             |
|---|-------------|-------------|-------------|
| H | -1.93043300 | 5.50865100  | -2.18664800 |
| H | 0.44640300  | 5.87192700  | -2.24513100 |
| H | 0.40739400  | 6.80358500  | 1.97937400  |
| H | -1.98662800 | 6.44340000  | 2.02639200  |
| H | 2.47799400  | 5.93092000  | -2.20870500 |
| H | 4.48376500  | 4.61198100  | -2.10806300 |
| H | 4.34190600  | 4.72961300  | 2.21136500  |
| H | 2.30326700  | 5.99688100  | 2.11043300  |
| H | 5.15189900  | 2.86757500  | 2.24657900  |
| H | 5.81803000  | 0.55753000  | 2.18659300  |
| H | 6.67870400  | 0.89771700  | -2.02894100 |
| H | 6.00209000  | 3.22178400  | -1.98052800 |
| H | 5.56057900  | -0.97461700 | -2.15322900 |
| H | 4.61043000  | -3.19978600 | -2.16318200 |
| H | 5.70195900  | -3.69553900 | 1.98165900  |
| H | 6.64961500  | -1.45235300 | 1.99740800  |
| H | 3.62397100  | -4.42796300 | 2.13983500  |
| H | 1.50189900  | -5.58206600 | 2.16318500  |
| H | 1.94937100  | -6.49799800 | -2.03484100 |
| H | 4.09144000  | -5.34576700 | -2.04996400 |
| H | -0.12717800 | -5.96264100 | -2.16849100 |
| H | -2.48512400 | -5.47293300 | -2.17641300 |
| H | -2.66469400 | -6.24187300 | 2.07348700  |
| H | -0.29297600 | -6.74450600 | 2.07571500  |
| H | -3.92818000 | -4.55089000 | 2.17655700  |
| H | -5.36167700 | -2.61582800 | 2.16890300  |

|   |             |             |             |
|---|-------------|-------------|-------------|
| H | -6.00103600 | -3.09312400 | -2.07563000 |
| H | -4.55019200 | -5.03541900 | -2.07359000 |
| H | -6.71605100 | -0.95411200 | 2.03569000  |
| H | -6.56785800 | 1.47359200  | 2.05035400  |
| H | -5.54247700 | 1.43343200  | -2.14043000 |
| H | -5.70087700 | -0.97693900 | -2.16336400 |

Sum of electronic and zero-point Energies = -2078.122848 Hartree

Table S16. XYZ coordinate of [5]CPP<sup>2+</sup>(D<sub>1</sub>) by UB3LYP/6-31G(d).

|   | X           | Y          | Z           |
|---|-------------|------------|-------------|
| C | -3.10500300 | 2.09861100 | -1.11143400 |
| C | -2.07752000 | 3.01477300 | -1.08670000 |
| C | -1.27696500 | 3.15918400 | 0.08515500  |
| C | -1.86481100 | 2.72835500 | 1.30564000  |
| C | -2.91013800 | 1.82933400 | 1.29555900  |
| C | -3.38396500 | 1.29862300 | 0.04962900  |
| C | 0.20424400  | 3.32251200 | 0.00255900  |
| C | 0.84225300  | 3.06838300 | -1.23123300 |
| C | 1.01834100  | 3.29338000 | 1.16029600  |
| C | 2.09635300  | 2.47239800 | -1.27093600 |
| C | 2.26561000  | 2.68507100 | 1.12798800  |
| C | 2.75029700  | 2.09149000 | -0.07022600 |
| C | 3.48841200  | 0.83031700 | -0.04040200 |
| C | 3.65944100  | 0.04176700 | -1.23297700 |
| C | 3.66419900  | 0.11600900 | 1.19495100  |



|   |             |             |             |
|---|-------------|-------------|-------------|
| C | 3.42892700  | -1.30846300 | -1.19312600 |
| C | 3.44069900  | -1.23541200 | 1.23481300  |
| C | 3.02523700  | -1.92546700 | 0.04129600  |
| C | 1.91534200  | -2.87600500 | 0.06884900  |
| C | 1.17292400  | -3.02695600 | 1.26913400  |
| C | 1.26296200  | -3.27386400 | -1.13076000 |
| C | -0.20706100 | -3.17999800 | 1.22901800  |
| C | -0.11468100 | -3.44075100 | -1.16352700 |
| C | -0.89335700 | -3.20650000 | -0.00483700 |
| C | -3.62253600 | -0.12022300 | -0.04684000 |
| C | -3.61830600 | -0.96772600 | 1.11399000  |
| C | -3.35046200 | -0.77637500 | -1.29337800 |
| C | -2.94702300 | -2.16955200 | 1.08769300  |
| C | -2.65671100 | -1.96788900 | -1.30502800 |
| C | -2.23983900 | -2.56763100 | -0.08547300 |
| H | 3.82728100  | 0.65422500  | 2.12239800  |
| H | 3.41111900  | -1.87116500 | -2.12021300 |
| H | 3.44541000  | -1.74686100 | 2.19129000  |
| H | 1.64322900  | -2.88107700 | 2.23462600  |
| H | 1.81366800  | -3.34291800 | -2.06268900 |
| H | -3.62862900 | 1.91267300  | -2.04360000 |
| H | -1.81193300 | 3.53330400  | -2.00203300 |
| H | -1.40384300 | 2.97433900  | 2.25549100  |
| H | -3.24306500 | 1.40311500  | 2.23528700  |
| H | 0.31038600  | 3.19714400  | -2.16679900 |
| H | 0.63825100  | 3.64243800  | 2.11458300  |

|   |             |             |             |
|---|-------------|-------------|-------------|
| H | 2.49133200  | 2.17645200  | -2.23584000 |
| H | 2.81027200  | 2.57401600  | 2.05943300  |
| H | 3.83494700  | 0.52319300  | -2.18897100 |
| H | -0.75157100 | -3.13214500 | 2.16495000  |
| H | -0.58803100 | -3.64219500 | -2.11866800 |
| H | -4.05057200 | -0.62105400 | 2.04707300  |
| H | -3.52729200 | -0.26449600 | -2.23268100 |
| H | -2.86401200 | -2.74652100 | 2.00279700  |
| H | -2.30355900 | -2.35092800 | -2.25569100 |

Sum of electronic and zero-point Energies = -1154.116655 Hartree

Table S17. XYZ coordinate of [6]CPP<sup>2+</sup>(D<sub>1</sub>) by UB3LYP/6-31G(d).

|   | X           | Y           | Z           |
|---|-------------|-------------|-------------|
| C | -2.58070900 | 3.31368100  | -0.04088500 |
| C | -2.72892300 | 2.58698700  | -1.24838600 |
| C | -3.29792200 | 1.31882100  | -1.24478900 |
| C | -3.78354300 | 0.75092600  | -0.05581800 |
| C | -3.91454000 | 1.59569000  | 1.06686400  |
| C | -3.30442300 | 2.84438700  | 1.08593600  |
| C | -3.78368100 | -0.75119600 | 0.05588800  |
| C | -1.40098400 | 4.16541600  | 0.06995400  |
| C | -3.29832000 | -1.31924800 | 1.24490700  |
| C | -2.72946700 | -2.58746300 | 1.24849200  |
| C | -2.58107700 | -3.31405100 | 0.04091300  |
| C | -3.30470100 | -2.84463500 | -1.08595100 |

|   |             |             |             |
|---|-------------|-------------|-------------|
| C | -3.91471600 | -1.59591000 | -1.06684800 |
| C | -0.68555400 | 4.22362700  | 1.31370900  |
| C | 0.68589300  | 4.22376600  | 1.31370100  |
| C | 1.40131700  | 4.16564600  | 0.06991900  |
| C | 0.68428800  | 4.62970300  | -1.08896800 |
| C | -0.68407800 | 4.62960500  | -1.08894100 |
| C | -1.40131600 | -4.16564300 | -0.06993400 |
| C | -0.68588700 | -4.22375000 | -1.31371300 |
| C | 0.68556000  | -4.22360800 | -1.31371600 |
| C | 1.40098600  | -4.16541300 | -0.06995800 |
| C | 0.68407500  | -4.62961400 | 1.08892900  |
| C | -0.68429000 | -4.62970800 | 1.08895200  |
| C | 2.58071200  | -3.31368300 | 0.04089400  |
| C | 2.72892100  | -2.58699100 | 1.24839700  |
| C | 3.29791300  | -1.31882200 | 1.24480200  |
| C | 3.78353600  | -0.75092600 | 0.05583300  |
| C | 3.91455400  | -1.59569500 | -1.06684300 |
| C | 3.30443800  | -2.84439100 | -1.08592000 |
| C | 3.78367100  | 0.75119500  | -0.05588100 |
| C | 3.29830900  | 1.31923800  | -1.24490300 |
| C | 2.72945800  | 2.58745200  | -1.24849700 |
| C | 2.58107700  | 3.31405300  | -0.04092500 |
| C | 3.30470200  | 2.84464400  | 1.08594000  |
| C | 3.91471200  | 1.59591700  | 1.06684700  |
| H | -2.26286300 | 2.93903700  | -2.16173400 |
| H | -3.24395700 | 0.72601700  | -2.15148300 |

|   |             |             |             |
|---|-------------|-------------|-------------|
| H | -4.40977400 | 1.23887100  | 1.96484300  |
| H | -3.33666600 | 3.42968800  | 1.99984800  |
| H | -3.24443600 | -0.72651200 | 2.15164900  |
| H | -2.26359200 | -2.93964900 | 2.16188200  |
| H | -3.33692100 | -3.42988900 | -1.99989200 |
| H | -4.40986300 | -1.23898900 | -1.96483400 |
| H | -1.21475200 | 4.08292500  | 2.24981400  |
| H | 1.21513100  | 4.08318900  | 2.24980100  |
| H | 1.22672200  | 4.88654000  | -1.99335700 |
| H | -1.22658600 | 4.88635400  | -1.99331000 |
| H | -1.21512100 | -4.08316400 | -2.24981400 |
| H | 1.21476100  | -4.08289600 | -2.24981700 |
| H | 1.22657900  | -4.88637600 | 1.99329700  |
| H | -1.22672700 | -4.88655200 | 1.99333700  |
| H | 2.26285700  | -2.93904200 | 2.16174300  |
| H | 3.24394100  | -0.72601900 | 2.15149500  |
| H | 4.40979700  | -1.23887600 | -1.96481700 |
| H | 3.33669100  | -3.42969400 | -1.99983000 |
| H | 3.24442100  | 0.72649400  | -2.15164000 |
| H | 2.26358000  | 2.93963000  | -2.16188900 |
| H | 3.33692500  | 3.42990500  | 1.99987700  |
| H | 4.40986100  | 1.23900300  | 1.96483300  |

Sum of electronic and zero-point Energies = -1385.157357 Hartree

Table S18. XYZ coordinate of [7]CPP<sup>2+</sup>(D<sub>1</sub>) by UB3LYP/6-31G(d).

|   | X           | Y           | Z           |
|---|-------------|-------------|-------------|
| C | -1.33965300 | 4.34420700  | -0.05072300 |
| C | -0.60447400 | 4.86073900  | 1.03675400  |
| C | 0.78480800  | 4.89770200  | 1.00273800  |
| C | 1.49513000  | 4.43075800  | -0.12690000 |
| C | 0.74580500  | 4.14471800  | -1.28701200 |
| C | -0.64268200 | 4.09680000  | -1.24648600 |
| C | 2.86883300  | 3.90297000  | -0.04657700 |
| C | 3.36818800  | 3.41455400  | 1.19156500  |
| C | 4.29579400  | 2.39743500  | 1.22428800  |
| C | 4.76555000  | 1.79839000  | 0.01297000  |
| C | 4.53801900  | 2.54751800  | -1.18734100 |
| C | 3.62258100  | 3.57305400  | -1.21163000 |
| C | 5.08128600  | 0.38979500  | -0.01004400 |
| C | 5.19421000  | -0.38506600 | 1.19003900  |
| C | 4.80500800  | -1.70366500 | 1.21340900  |
| C | 4.26612800  | -2.32374700 | 0.04772000  |
| C | 4.50864800  | -1.66794100 | -1.18976900 |
| C | 4.91270200  | -0.35186000 | -1.22168100 |
| C | 3.25106000  | -3.38981800 | 0.12657600  |
| C | 2.44945900  | -3.45226900 | 1.28515700  |
| C | 1.17488000  | -4.00510000 | 1.24271100  |
| C | 0.65367900  | -4.52843800 | 0.04634500  |
| C | 1.54124000  | -4.67966300 | -1.03956200 |
| C | 2.81196700  | -4.11686700 | -1.00345200 |
| C | -0.82626600 | -4.57664800 | -0.10713200 |

|   |             |             |             |
|---|-------------|-------------|-------------|
| C | -1.69906300 | -4.72392900 | 0.99708200  |
| C | -2.98240900 | -4.20727200 | 0.95820100  |
| C | -3.46451600 | -3.53202200 | -0.19886600 |
| C | -2.68651900 | -3.66630300 | -1.38108000 |
| C | -1.39732000 | -4.16669600 | -1.33059600 |
| C | -4.44658200 | -2.46367100 | -0.11771500 |
| C | -4.80437100 | -1.89553600 | 1.14819300  |
| C | -5.10133700 | -0.56057800 | 1.25549200  |
| C | -5.06436800 | 0.29135900  | 0.10347500  |
| C | -5.14109800 | -0.37404500 | -1.16315400 |
| C | -4.83970900 | -1.70799800 | -1.27051100 |
| C | -4.63307100 | 1.67712600  | 0.18692500  |
| C | -3.98730800 | 2.12838100  | 1.37000500  |
| C | -3.03693600 | 3.13329200  | 1.32206700  |
| C | -2.69726600 | 3.75202400  | 0.10045800  |
| C | -3.54826600 | 3.51318200  | -1.00457900 |
| C | -4.48628600 | 2.49600600  | -0.96827600 |
| H | -1.11640200 | 5.17469900  | 1.94145500  |
| H | 1.31979800  | 5.24166200  | 1.88262100  |
| H | 1.24367600  | 3.82360500  | -2.19511100 |
| H | -1.17319000 | 3.73811100  | -2.12198100 |
| H | 2.91348300  | 3.73466500  | 2.12239800  |
| H | 4.54734400  | 1.95773600  | 2.18234600  |
| H | 5.03885400  | 2.26659000  | -2.10765100 |
| H | 3.41823700  | 4.08010300  | -2.14893200 |
| H | 5.52574900  | 0.08256500  | 2.11098100  |

|   |             |             |             |
|---|-------------|-------------|-------------|
| H | 4.83598900  | -2.24966700 | 2.15059500  |
| H | 4.23452400  | -2.15110600 | -2.12094600 |
| H | 4.95248400  | 0.15359000  | -2.17951000 |
| H | 2.75968700  | -2.94798700 | 2.19352100  |
| H | 0.54034600  | -3.90838300 | 2.11712000  |
| H | 1.21527800  | -5.18328300 | -1.94468000 |
| H | 3.44439300  | -4.19825000 | -1.88217200 |
| H | -1.33931800 | -5.17593700 | 1.91615500  |
| H | -3.59485900 | -4.26971700 | 1.85145200  |
| H | -3.03684700 | -3.25169200 | -2.31881600 |
| H | -0.78392800 | -4.11380300 | -2.22361400 |
| H | -4.71989300 | -2.48573100 | 2.05351100  |
| H | -5.27089500 | -0.13772400 | 2.23937500  |
| H | -5.31297500 | 0.19660300  | -2.06862900 |
| H | -4.80902600 | -2.16177400 | -2.25473200 |
| H | -4.12561700 | 1.60076900  | 2.30621800  |
| H | -2.45977600 | 3.34582100  | 2.21551500  |
| H | -3.41669700 | 4.07775600  | -1.92239900 |
| H | -5.06613100 | 2.29187500  | -1.86216700 |

Sum of electronic and zero-point Energies = -1616.172617 Hartree

Table S19. XYZ coordinate of [8]CPP<sup>2+</sup>(D<sub>1</sub>) by UB3LYP/6-31G(d).

|   | X          | Y          | Z           |
|---|------------|------------|-------------|
| C | 5.43095700 | 1.56202600 | -0.07515900 |
| C | 5.74543300 | 0.83846100 | 1.11008900  |

|   |             |             |             |
|---|-------------|-------------|-------------|
| C | 5.66283400  | -0.53980600 | 1.14558800  |
| C | 5.24668500  | -1.27478500 | 0.00661200  |
| C | 5.20010000  | -0.57942700 | -1.22330400 |
| C | 5.29544600  | 0.79892400  | -1.26655900 |
| C | 4.61692300  | -2.60838000 | 0.11394400  |
| C | 3.90533200  | -2.92329100 | 1.28814600  |
| C | 2.92338200  | -3.90525000 | 1.28822000  |
| C | 2.60837800  | -4.61691900 | 0.11408800  |
| C | 3.46419100  | -4.44628200 | -0.99623600 |
| C | 4.44621100  | -3.46427100 | -0.99630500 |
| C | 1.27477600  | -5.24668100 | 0.00688200  |
| C | 0.53979500  | -5.66262600 | 1.14593600  |
| C | -0.83846800 | -5.74526500 | 1.11044600  |
| C | -1.56203800 | -5.43098100 | -0.07484900 |
| C | -0.79893000 | -5.29567100 | -1.26627400 |
| C | 0.57941800  | -5.20034300 | -1.22304500 |
| C | -2.93014300 | -4.94144900 | -0.04314300 |
| C | -3.50035200 | -4.47264200 | 1.17834900  |
| C | -4.47266200 | -3.50027200 | 1.17829900  |
| C | -4.94140800 | -2.93014500 | -0.04325300 |
| C | -4.62535600 | -3.65456400 | -1.23566300 |
| C | -3.65448800 | -4.62544000 | -1.23561400 |
| C | -5.43091700 | -1.56203600 | -0.07507800 |
| C | -5.74547700 | -0.83842200 | 1.11011400  |
| C | -5.66288000 | 0.53985200  | 1.14554700  |
| C | -5.24663700 | 1.27477000  | 0.00656700  |



|   |             |             |             |
|---|-------------|-------------|-------------|
| C | -5.19996700 | 0.57935900  | -1.22331300 |
| C | -5.29531600 | -0.79899000 | -1.26650500 |
| C | -4.61689500 | 2.60837700  | 0.11386000  |
| C | -3.90540800 | 2.92336300  | 1.28810000  |
| C | -2.92346000 | 3.90532500  | 1.28818400  |
| C | -2.60838800 | 4.61695400  | 0.11404600  |
| C | -3.46412200 | 4.44624900  | -0.99633100 |
| C | -4.44610700 | 3.46420300  | -0.99642800 |
| C | -1.27479400 | 5.24675400  | 0.00691700  |
| C | -0.53978400 | 5.66240700  | 1.14605700  |
| C | 0.83847800  | 5.74500700  | 1.11057500  |
| C | 1.56203300  | 5.43102100  | -0.07480900 |
| C | 0.79890700  | 5.29601100  | -1.26625600 |
| C | -0.57944300 | 5.20067600  | -1.22302800 |
| C | 2.93012100  | 4.94143800  | -0.04319100 |
| C | 3.50036000  | 4.47258700  | 1.17827500  |
| C | 4.47269700  | 3.50025700  | 1.17818800  |
| C | 4.94141000  | 2.93012200  | -0.04337500 |
| C | 4.62524300  | 3.65448700  | -1.23578500 |
| C | 3.65439300  | 4.62538900  | -1.23569400 |
| H | 6.00848400  | 1.36836400  | 2.01948700  |
| H | 5.86024900  | -1.05638100 | 2.07944900  |
| H | 4.95477600  | -1.11169700 | -2.13581800 |
| H | 5.12729100  | 1.29427800  | -2.21573100 |
| H | 4.02601700  | -2.31402600 | 2.17735000  |
| H | 2.31418300  | -4.02586500 | 2.17747800  |

|   |             |             |             |
|---|-------------|-------------|-------------|
| H | 3.32989600  | -5.05400100 | -1.88592200 |
| H | 5.05385800  | -3.33002400 | -1.88604800 |
| H | 1.05636800  | -5.85988100 | 2.07983100  |
| H | -1.36836900 | -6.00814600 | 2.01989500  |
| H | -1.29427700 | -5.12770000 | -2.21548000 |
| H | 1.11168000  | -4.95519000 | -2.13560700 |
| H | -3.07457700 | -4.77633500 | 2.12750000  |
| H | -4.77638900 | -3.07442300 | 2.12740700  |
| H | -5.11241600 | -3.39867600 | -2.17030800 |
| H | -3.39858300 | -5.11256200 | -2.17022000 |
| H | -6.00859800 | -1.36829000 | 2.01951300  |
| H | -5.86035900 | 1.05648100  | 2.07936600  |
| H | -4.95457200 | 1.11158700  | -2.13583300 |
| H | -5.12708700 | -1.29439700 | -2.21563700 |
| H | -4.02616100 | 2.31414500  | 2.17732700  |
| H | -2.31434000 | 4.02600000  | 2.17748700  |
| H | -3.32978300 | 5.05393100  | -1.88603600 |
| H | -5.05369500 | 3.32990000  | -1.88620500 |
| H | -1.05633300 | 5.85943200  | 2.08001400  |
| H | 1.36838700  | 6.00764000  | 2.02008900  |
| H | 1.29423600  | 5.12825800  | -2.21551100 |
| H | -1.11171200 | 4.95573400  | -2.13564200 |
| H | 3.07464200  | 4.77628700  | 2.12744800  |
| H | 4.77648000  | 3.07444300  | 2.12729200  |
| H | 5.11221300  | 3.39856000  | -2.17046700 |
| H | 3.39842600  | 5.11247300  | -2.17030300 |

Sum of electronic and zero-point Energies = -1847.176949 Hartree

Table S20. XYZ coordinate of [9]CPP<sup>2+</sup>(D<sub>1</sub>) by UB3LYP/6-31G(d).

|   | X           | Y          | Z           |
|---|-------------|------------|-------------|
| C | -5.21502100 | 2.92322500 | 0.06477200  |
| C | -5.07026600 | 3.76203400 | -1.06186800 |
| C | -4.14648200 | 4.79721600 | -1.06790000 |
| C | -3.32665900 | 5.04789800 | 0.05558600  |
| C | -3.61790500 | 4.33748700 | 1.23859200  |
| C | -4.53842700 | 3.29892500 | 1.24184600  |
| C | -2.05422700 | 5.78461800 | -0.03977600 |
| C | -1.34268400 | 5.80076500 | -1.26266600 |
| C | 0.01441700  | 6.05373100 | -1.29644000 |
| C | 0.74802300  | 6.30637100 | -0.10569100 |
| C | -0.01903700 | 6.53481200 | 1.07156900  |
| C | -1.37648400 | 6.28323000 | 1.10150100  |
| C | 2.17982700  | 6.05018400 | -0.05938500 |
| C | 2.93420700  | 5.76241400 | -1.23526400 |
| C | 4.09296700  | 5.02403400 | -1.17679800 |
| C | 4.58469200  | 4.51537800 | 0.06201800  |
| C | 4.00282000  | 5.07383300 | 1.23863100  |
| C | 2.84505400  | 5.81381200 | 1.18009000  |
| C | 5.50421300  | 2.55287100 | 1.29707100  |
| C | 5.84358200  | 1.21500500 | 1.26213600  |
| C | 6.12050900  | 0.56141900 | 0.03780900  |
| C | 6.28445700  | 1.38587700 | -1.10436600 |

|   |             |             |             |
|---|-------------|-------------|-------------|
| C | 5.94399100  | 2.72352800  | -1.07318400 |
| C | 5.98325800  | -0.90207300 | -0.05717500 |
| C | 5.45944100  | -1.46420000 | -1.24001700 |
| C | 4.90030900  | -2.73430800 | -1.24259300 |
| C | 4.84155300  | -3.50534800 | -0.06511500 |
| C | 5.54361700  | -3.02312900 | 1.06116100  |
| C | 6.09814600  | -1.75140300 | 1.06667000  |
| C | 3.86174400  | -4.61062700 | 0.02175400  |
| C | 3.15450800  | -4.81332300 | 1.22482600  |
| C | 1.95722600  | -5.51004200 | 1.24274800  |
| C | 1.39882600  | -6.03545000 | 0.05366600  |
| C | 2.21662600  | -6.01154300 | -1.10380600 |
| C | 3.41782500  | -5.32231200 | -1.11650800 |
| C | 5.41927800  | 3.32440700  | 0.10617800  |
| C | -0.03958900 | -6.30390300 | -0.00448400 |
| C | -0.74844500 | -6.14237200 | -1.22440600 |
| C | -2.10415500 | -5.89405600 | -1.23411100 |
| C | -2.84234700 | -5.78568400 | -0.02124600 |
| C | -2.18022700 | -6.22899100 | 1.16219300  |
| C | -0.82715200 | -6.48296200 | 1.16816300  |
| C | -4.06531000 | -5.00490800 | 0.02060600  |
| C | -4.47545300 | -4.38212700 | 1.23384200  |
| C | -5.27082100 | -3.25669200 | 1.22464700  |
| C | -5.71404200 | -2.67979400 | 0.00469400  |
| C | -5.54480100 | -3.46907900 | -1.16853800 |
| C | -4.74562200 | -4.58989400 | -1.16292500 |

|   |             |             |             |
|---|-------------|-------------|-------------|
| C | -6.07350100 | -1.26189200 | -0.05288600 |
| C | -6.39144800 | -0.50901300 | 1.10550600  |
| C | -6.26822400 | 0.87019600  | 1.11795400  |
| C | -5.80990400 | 1.57139800  | -0.02134600 |
| C | -5.70205500 | 0.84434700  | -1.22505600 |
| C | -5.83397900 | -0.53444700 | -1.24283200 |
| H | -5.65587200 | 3.57401300  | -1.95660300 |
| H | -4.03338700 | 5.39443600  | -1.96751300 |
| H | -3.03255700 | 4.51242100  | 2.13492900  |
| H | -4.64025400 | 2.69873500  | 2.13980400  |
| H | -1.83480900 | 5.48785000  | -2.17695100 |
| H | 0.52967000  | 5.93766600  | -2.24233100 |
| H | 0.46495600  | 6.86672000  | 1.98350900  |
| H | -1.91762500 | 6.42378700  | 2.03164000  |
| H | 2.56280200  | 6.06395900  | -2.20781400 |
| H | 4.57386400  | 4.74874400  | -2.10806000 |
| H | 4.42952200  | 4.85970800  | 2.21163200  |
| H | 2.38967000  | 6.12937800  | 2.11141000  |
| H | 5.18868400  | 2.97251400  | 2.24467300  |
| H | 5.77115900  | 0.63760800  | 2.17720600  |
| H | 6.63503600  | 0.95349200  | -2.03594300 |
| H | 6.03837300  | 3.30169400  | -1.98573800 |
| H | 5.37379500  | -0.85990400 | -2.13673300 |
| H | 4.39746900  | -3.07812200 | -2.14030000 |
| H | 5.61748500  | -3.63346700 | 1.95607700  |
| H | 6.59380000  | -1.39903400 | 1.96605800  |

|   |             |             |             |
|---|-------------|-------------|-------------|
| H | 3.48039800  | -4.31722800 | 2.13276200  |
| H | 1.39107500  | -5.53417000 | 2.16709800  |
| H | 1.88966200  | -6.50741000 | -2.01217800 |
| H | 3.99888800  | -5.29267700 | -2.03300900 |
| H | -0.20565100 | -6.08094700 | -2.16069100 |
| H | -2.57444200 | -5.65081500 | -2.17966700 |
| H | -2.73425600 | -6.32922400 | 2.08926900  |
| H | -0.35190700 | -6.77576300 | 2.09832400  |
| H | -4.05800000 | -4.70766800 | 2.17944100  |
| H | -5.44448500 | -2.73970300 | 2.16144000  |
| H | -6.00986100 | -3.16044800 | -2.09870900 |
| H | -4.60318900 | -5.13417600 | -2.09024600 |
| H | -6.70302000 | -1.01342900 | 2.01454700  |
| H | -6.48242800 | 1.41027900  | 2.03494800  |
| H | -5.39065700 | 1.34805100  | -2.13387500 |
| H | -5.62206400 | -1.05848800 | -2.16802300 |

Sum of electronic and zero-point Energies = -2078.173680 Hartree

### Changes in bond lengths of $[n]$ CPP $^{2+}$ .

Table S21. Distribution of bond lengths of  $[n]$ CPP $^{2+}$  in the  $S_0$  and  $S_1$  states and changes in averaged bond lengths ( $\Delta r_{av}$ ) estimated at UB3LYP/6-31G(d) level.

| $n$ | Bond <sup>a</sup> | $S_0$ <sup>b</sup>       | $S_1$ <sup>b</sup>       | $\Delta r_{av}$ <sup>c</sup> |
|-----|-------------------|--------------------------|--------------------------|------------------------------|
| 5   | C(1)-C(1')        | 1.4400 (1.4400)          | 1.4420 – 1.4925 (1.4700) | 0.0300                       |
|     | C(1)-C(2)         | 1.4346 (1.4346)          | 1.4121 – 1.4399 (1.4267) | -0.0079                      |
|     | C(2)-C(3)         | 1.3718 (1.3718)          | 1.3704 – 1.3891 (1.3806) | 0.0088                       |
| 6   | C(1)-C(1')        | 1.4457 (1.4457)          | 1.4592 – 1.5063 (1.4749) | 0.0292                       |
|     | C(1)-C(2)         | 1.4300 (1.4300)          | 1.4043 – 1.4396 (1.4212) | -0.0088                      |
|     | C(2)-C(3)         | 1.3738 (1.3738)          | 1.3684 – 1.3900 (1.3833) | 0.0095                       |
| 7   | C(1)-C(1')        | 1.4507 – 1.4515 (1.4511) | 1.4437 – 1.4888 (1.4680) | 0.0169                       |
|     | C(1)-C(2)         | 1.4245 – 1.4275 (1.4262) | 1.4060 – 1.4334 (1.4207) | -0.0055                      |
|     | C(2)-C(3)         | 1.3753 – 1.3768 (1.3758) | 1.3718 – 1.3903 (1.3817) | 0.0059                       |
| 8   | C(1)-C(1')        | 1.4557 (1.4557)          | 1.4534 – 1.4787 (1.4661) | 0.0104                       |
|     | C(1)-C(2)         | 1.4211 – 1.4246 (1.4229) | 1.4086 – 1.4306 (1.4194) | -0.0035                      |
|     | C(2)-C(3)         | 1.3771 – 1.3788 (1.3779) | 1.3730 – 1.3888 (1.3816) | 0.0037                       |
| 9   | C(1)-C(1')        | 1.4593 – 1.4585 (1.4593) | 1.4516 – 1.4796 (1.4662) | 0.0069                       |
|     | C(1)-C(2)         | 1.4184 – 1.4232 (1.4205) | 1.4087 – 1.4268 (1.4182) | -0.0023                      |
|     | C(2)-C(3)         | 1.3786 – 1.3805 (1.3794) | 1.3753 – 1.3878 (1.3819) | 0.0025                       |

<sup>a</sup> Numbering of the carbon atoms is indicated below. <sup>b</sup> Numbers in parentheses are averaged values. Unit: Å. <sup>c</sup> Difference between averaged values in the  $S_1$  and  $S_0$  states. Unit: Å.

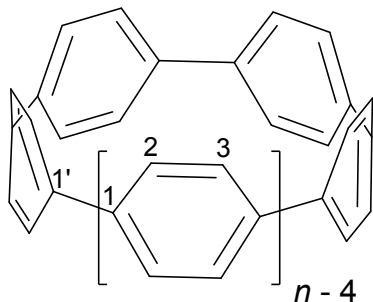

Supplement: c8cp04860f1.pdf [file c8cp04860f1.pdf]
